1           **Proteomic profiling of *Mycobacterium tuberculosis***  
2           **culture filtrate identifies novel O-glycosylated proteins**

3

4           **Paula Tucci<sup>1\*</sup>, Madelón Portela<sup>2,3</sup>, Carlos Rivas Chetto<sup>4</sup>, Gualberto**  
5           **González-Sapienza<sup>5</sup>, Mónica Marín<sup>1</sup>**

6

7

8

9           <sup>1</sup> Sección Bioquímica, Facultad de Ciencias, Universidad de la República, Montevideo, Uruguay

10          <sup>2</sup> Unidad de Bioquímica y Proteómica Analíticas, Institut Pasteur de Montevideo, Montevideo,  
11          Uruguay

12          <sup>3</sup> Facultad de Ciencias, Universidad de la República, Montevideo, Uruguay

13          <sup>4</sup> Departamento de Laboratorio, Comisión Honoraria para la Lucha Antituberculosa y  
14          Enfermedades Prevalentes, Centro de Referencia Nacional para Micobacterias, Ministerio de  
15          Salud Pública, Montevideo, Uruguay.

16          <sup>5</sup> Cátedra de Inmunología, DEPBIO, Facultad de Química, Montevideo, Uruguay

17

18          \* Corresponding autor

19          E-mail: ptucci@fcien.edu.uy (PT)

## 20 **Abstract**

21 Despite being the subject of intensive research, tuberculosis, caused by *Mycobacterium*  
22 *tuberculosis*, remains at present the leading cause of death from an infectious agent. Secreted  
23 and cell wall proteins interact with the host and play important roles in pathogenicity. These  
24 proteins have been explored as candidate diagnostic markers, potential drug targets or vaccine  
25 antigens, and special attention has been given to the role of their post-translational  
26 modifications. With the purpose of contributing to the proteomic characterization of this  
27 important pathogen including an O-glycosylation profile analysis, we performed a shotgun  
28 analysis of culture filtrate proteins of *M. tuberculosis* based on a liquid nano-HPLC tandem mass  
29 spectrometry and a label-free spectral counting normalization approach for protein  
30 quantification. We identified 1314 *M. tuberculosis* proteins in culture filtrate and found that the  
31 most abundant proteins belong to the extracellular region or cell wall compartment, and that  
32 the functional categories with higher protein abundance factor were virulence, detoxification  
33 and adaptation, and cell wall and cell processes. In culture filtrate, 140 proteins were predicted  
34 to contain one of the three types of bacterial N-terminal signal peptides. Besides, various  
35 proteins belonging to the ESX secretion systems, and to the PE and PPE families, secreted by the  
36 type VII secretion system using nonclassical secretion signals, were also identified. O-  
37 glycosylation was identified as a frequent modification, being present in 108 proteins, principally  
38 lipoproteins and secreted immunogenic antigens. We could identify a group of proteins  
39 consistently detected in previous studies, most of which were highly abundant proteins.  
40 Interestingly, we also provide proteomic evidence for 62 novel O-glycosylated proteins, aiding  
41 to the glycoproteomic characterization of relevant antigenic membrane and exported proteins.

## 42 Introduction

43 *Mycobacterium tuberculosis*, the causative agent of tuberculosis (TB) remains a major public  
44 health threat. According to the last Global Tuberculosis Report published by the World Health  
45 Organization (WHO) an estimate of 10 million people developed TB disease in 2017. Moreover,  
46 TB is at present the leading cause of death from a single infectious agent, causing an estimated  
47 1.3 million deaths among HIV-negative people and approximately 300 thousand deaths among  
48 HIV-positive people [1]. Although TB diagnosis and successful treatment averts millions of  
49 deaths each year, there are still large and persistent gaps related to this infection that must be  
50 resolved in order to accelerate progress towards the goal of ending the TB epidemic endorsed  
51 by WHO [1].

52 *M. tuberculosis* (MTB), has evolved successful mechanisms to circumvent the hostile  
53 environment of the macrophage, such as inhibiting the phagosome-lysosome fusion and to  
54 escape the acidic environment inside the phagolysosome [2]. MTB may be unique in its ability  
55 to exploit adaptive immune responses, through inflammatory lung tissue damage, to promote  
56 its transmission [3]. It has been proposed that this microorganism was pressed by an  
57 evolutionary selection that resulted in an infection that induces partial immunity, where the  
58 host survives a long period after being infected with the pathogen, aiding in microorganism  
59 persistence and transmission [3]. MTB mechanisms of evasion of host immune system were  
60 proposed to have consequences in the design of TB vaccines [3] and to be in part responsible of  
61 the poor performance of immune-based diagnostic tools [4,5].

62 In that context, there is a pressing need to advance the knowledge of the mechanisms that  
63 mediate its virulence. Among the tools to study the biology of MTB, *M. tuberculosis* H37Rv is a  
64 well-characterized human lung isolate and one of the most commonly used laboratory strains  
65 of *M. tuberculosis*. This virulent strain has been used in several investigations to understand the  
66 molecular mechanisms of MTB virulence, pathogenicity and persistence, as it provides a unique

67 platform to investigate biochemical and signaling pathways associated with pathogenicity [6]. In  
68 particular, it has been extensively used to identify pathogen biomarkers of *M. tuberculosis*  
69 infection and disease. These are generally major components identified by electrophoresis and  
70 mass spectrometry both in total extracts and culture filtrates [7–9].

71 The cell envelope and secreted components of MTB are among the bacterial molecules most  
72 commonly described as potential biomarkers of the infection, or involved in host immune  
73 evasion. Mycobacteria possess a remarkably complex cell envelope consisting of a cytoplasmic  
74 membrane and a cell wall. These constitute an efficient permeability barrier that plays a crucial  
75 role in intrinsic drug resistance and contributes to the resilience of the pathogen in infected  
76 hosts [10]. Membrane and exported proteins are crucial players for maintenance and survival of  
77 bacterial organisms, and their contribution to pathogenesis and immunological responses make  
78 these proteins relevant targets for medical research [11]. In particular, these proteins are known  
79 to play pivotal roles in host-pathogen interactions and, therefore, represent potential drug  
80 targets and vaccine candidates [12].

81 Overall, the bulk of exported proteins are transported by the general secretory Sec-translocase  
82 pathway. This is performed by recognition of the signal peptide in the nascent preprotein, which  
83 is subsequently transferred to the machinery that executes its translocation across the  
84 membrane [13]. Besides, mycobacteria utilize type VII secretion systems (T7SS) to export many  
85 of their important virulence proteins. The T7SS encompasses five homologous secretion systems  
86 (designated ESX-1 through ESX-5). Most pathogenic mycobacterial species, including the human  
87 pathogen *M. tuberculosis*, possess all five ESX systems [14,15]. The ability of MTB to subvert host  
88 immune defenses is related to the secretion of multiple virulence factors via these specialized  
89 secretion systems [15].

90 Recent developments in mass spectrometry-based proteomics have highlighted the occurrence  
91 of numerous types of post-translational modifications (PTMs) in proteomes of prokaryotes  
92 which create an enormous diversity and complexity of gene products [16]. This PTMs, mainly

93 glycosylation, lipidation and phosphorylation, are involved in signaling and response to stress,  
94 adaptation to changing environments, regulation of toxic and damaged proteins, protein  
95 localization and host-pathogen interactions. In MTB, more frequently O-glycosylation events  
96 have been reported [17], being this post-translational modification often found, in conjunction  
97 with acylation, in membrane lipoproteins [18]. A mechanistic model of this modification was  
98 proposed in which the initial glycosyl molecule is transferred to the hydroxyl oxygen of the  
99 acceptor Thr or Ser residue, a process catalyzed by the protein O-mannosyltransferase (PMT)  
100 (Rv1002c) [19]. Hereafter, further sugars are added one at a time, but the enzymes involved in  
101 this elongation are still unknown [16]. O-glycosylation appears essential for MTB virulence, since  
102 Rv1002c deficient strains are highly attenuated in immunocompromised mice [20]. Despite the  
103 vital importance of glycosylated proteins in MTB pathogenesis, the current knowledge in this  
104 regard is still limited. Recent evidence using whole cell extracts revealed that glycosylation could  
105 be much more frequent than previously thought, explaining the phenotypic diversity and  
106 virulence in the *Mycobacterium tuberculosis* complex [17], but in culture filtrates of this  
107 pathogen only a few secreted and cell wall-associated glycoproteins have been described to date  
108 [18,21].

109 In this study we describe a straightforward methodology based on a high throughput label-free  
110 quantitative proteomic approach in order to provide a comprehensive identification and  
111 quantitation of proteins in *M. tuberculosis* H37Rv culture filtrate. The extent of protein O-  
112 glycosylation was also evaluated with the purpose of collaborating with the glycoproteomic  
113 characterization of this pathogen. With the goal to validate and integrate our results, a  
114 comprehensive comparative analysis was performed against former research papers that have  
115 addressed this issue using different and complementary approaches. The results presented here  
116 make focus on the principal exported and secreted virulent factors with the aim to contribute  
117 to a deep proteomic characterization of this relevant pathogen and to collaborate to a better  
118 understanding of the pathogenesis and survival strategies adopted by MTB.

## 119 **Materials and Methods**

### 120 **Mycobacterial strain and growth conditions**

121 *Mycobacterium tuberculosis* H37Rv strain (ATCC® 25618™) was grown for 3 weeks at 37°C in  
122 Lowenstein Jensen solid medium and after growth was achieved it was subcultured in  
123 Middlebrook 7H9 broth supplemented with albumin, dextrose, and catalase (ADC) enrichment  
124 (Difco, Detroit, MI, USA) for 12 days with gentle agitation at 37°C. Mycobacterial cells were  
125 pelleted at 4000xg for 15 min at 4°C and washed 3 times with cold phosphate-buffered saline.  
126 Mycobacterial cells were subsequently cultured as surface pellicles for 3 to 4 weeks at 37°C  
127 without shaking in 250 mL of Sauton minimal medium, a synthetic protein-free culture medium,  
128 which was prepared as previously described [8].

### 129 **Culture filtrate protein preparation**

130 Bacterial cells were removed by centrifugation and culture filtrate protein (CFP) was prepared  
131 by filtering the supernatant through 0.2 µm pore size filters (Millipore, USA). After sterility  
132 testing of CFP in Mycobacteria Growth Indicator Tube (MGIT) supplemented with MGIT 960  
133 supplement (BD, Bactec) for 42 days at 37°C in BD BACTEC™ MGIT™ automated mycobacterial  
134 detection system, CFP was concentrated using centrifugal filter devices (Macrosep Advance,  
135 3kDa MWCO (Pall Corporation, USA)). Concentrated CFP was buffer exchanged to phosphate-  
136 buffered saline and total protein concentration was quantified by BCA (Pierce BCA Protein Assay  
137 Kit, Thermo Fischer Scientific).

### 138 **1D and 2D gel electrophoresis**

139 *M. tuberculosis* CFP samples were analyzed by 1D and 2D gel electrophoresis and were used for  
140 raising polyclonal antibodies in rabbits as described below. For 1D gel electrophoresis CFP  
141 diluted in SDS-PAGE loading buffer was loaded onto 15% SDS-PAGE and silver nitrate staining

142 was performed as described elsewhere [22]. For 2-Dimensional gel electrophoresis 50 µg of *M.*  
143 *tuberculosis* CFP was purified and concentrated using 2-D Clean-Up Kit (GE Healthcare) and  
144 resuspended in 125 µl of rehydration solution (urea 7M, thiourea 2M, CHAPS 2%, IPG Buffer 3-  
145 10 0,5%, DTT 20 mM, bromophenol blue 0,002%). Two experiments were run in parallel, one for  
146 silver nitrate staining and the other for western blot analysis. Proteins were loaded into 7 cm  
147 IPG Strips 3-10 (GE Healthcare) by overnight passive rehydration. First dimension isoelectric  
148 focusing (IEF) run was performed using Ettan IPGphor 3 IEF System (GE Healthcare) according to  
149 manufacturer instructions. Disulfide bonds were reduced with dithiothreitol (10 mg/mL) and  
150 subsequently alkylated with 25 mg/mL iodoacetamide. The second dimension was performed  
151 on hand-cast gels (15% SDS-PAGE, 10x10x0.1cm) and silver nitrate staining was performed as  
152 described above. In both analyses the molecular weight marker was PageRuler Prestained  
153 Protein Ladder (Thermo Fischer Scientific). For Western blot analysis, proteins were transferred  
154 onto a nitrocellulose membrane (Amersham Protran 0.45 µM NC (GE Healthcare)) for one hour  
155 at 400mA. Membrane was blocked and blotted as described below.

## 156 **Anti-CFP antibodies production and western blot**

157 To produce polyclonal antibodies against *M. tuberculosis* CFP, two New Zealand White rabbits  
158 (2-2.5 kg) were immunized subcutaneously with 100 µg of CFP, followed by 1 booster of 100 µg  
159 and 2 additional boosters (50 µg each) of CFP in Incomplete Freund Adjuvant using an authorized  
160 protocol (Comité de Etica de Facultad de Química, Exp. N° 101900-000717-14). At the end the  
161 rabbits were bled and a pool of hyperimmune serum was obtained as described elsewhere [23].  
162 Anti-CFP polyclonal antibodies were purified by affinity chromatography using a HiTrap Protein  
163 A HP column (GE Healthcare) according to manufacturer instructions.  
164 Anti-CFP polyclonal antibodies were used to identify immunoreactive bands and spots in 1D and  
165 2D electrophoresis. Briefly, blocked membranes were incubated for 1h at room temperature  
166 with anti-CFP antibodies at a final concentration of 10 µg/mL in PBS pH7.4, 5% low fat milk. For

167 antigen-antibody detection membranes were incubated for 1h at room temperature with a  
168 1:2500 dilution of anti-rabbit IgG (whole molecule)— alkaline phosphatase antibody produced  
169 in goat (Sigma A0545) in PBS pH7.4, 5% low fat milk. Membranes were incubated with  
170 SuperSignal™ West Pico PLUS Chemiluminescent Substrate (Thermo Fischer Scientific, #34580)  
171 according to manufacturer instructions. Images were acquired with Synoptics 4.2MP Camera  
172 using increasing and accumulative exposure times in G:Box Chemi XT4 (Syngene, Cambridge,  
173 UK) and visualized with GenSys Software (V1.3.3.0). The following reagent, obtained through BEI  
174 Resources, NIAID, NIH: Polyclonal Anti-Mycobacterium tuberculosis CFP minus LAM (antiserum,  
175 Rabbit), NR-13809, was used to confirm the immune recognition of our Anti-CFP polyclonal  
176 antibody. Some of the protein spots recognized by the anti-CFP antibody were further analyzed  
177 by mass spectrometry (MS).

## 178 **Protein identification by MALDI-TOF/TOF.**

179 Bands or spots from 1D or 2D gel electrophoresis were selected for MS MALDI-TOF/TOF analysis.  
180 In-gel Cys alkylation was performed by subsequent incubation with 10 mM dithiothreitol and 55  
181 mM iodoacetamide as previously described [24]. In-gel digestion of selected protein bands or  
182 spots was performed overnight at 37 °C by incubation with trypsin (Sequencing grade, Promega,  
183 Madison, USA). Afterwards peptides were extracted as previously described [24] and samples  
184 were vacuum-dried using CentriVap Vacuum Concentrator (Labconco), resuspended in 0.1%  
185 TFA, and desalted using C18 OMIX tips (Agilent). Peptides were eluted with matrix solution ( $\alpha$ -  
186 cyano-4-hydroxycinnamic acid in 60% acetonitrile, 0.1% TFA) directly into the MALDI sample  
187 plate. Spectra acquisition was performed on a 4800 MALDI TOF/TOF (Abi Sciex) operating in  
188 positive reflector mode. Spectra were externally calibrated using a mixture of peptide standards  
189 (Applied Biosystems).  
190 MS/MS analysis of selected precursor ions was performed. Database searching (NCBI nr  
191 20150912) was performed with Mascot (<http://www.matrixscience.com>) using the following



192 parameters: unrestricted taxonomy; one trypsin missed cleavage allowed; methionine oxidation  
193 and carbamidomethylation of cysteine as variable modification; peptide tolerance of 0.05 Da  
194 and a MS/MS tolerance of 0.4 Da. Significant protein scores ( $p < 0.05$ ) and at least one peptide  
195 with significant ions score ( $p < 0.05$ ) per protein were used as criteria for positive identification  
196 [25].

## 197 **Liquid chromatography tandem mass spectrometry (LC MS/MS)**

198 Two replicas of *M. tuberculosis* CFP (25  $\mu$ g) were loaded in SDS-PAGE 15% and stained with CCB  
199 G-250 as described elsewhere [26]. Six gel slices were excised from each lane according to  
200 protein density. In-gel Cys alkylation, in gel-digestion and peptide extraction was performed as  
201 described above. Tryptic peptides were separated using nano-HPLC (UltiMate 3000, Thermo  
202 Scientific) coupled online with a Q-Exactive Plus hybrid quadrupole-Orbitrap mass spectrometer  
203 (Thermo Fischer Scientific). Peptide mixtures were injected into a trap column Acclaim PepMap  
204 100, C18, 75  $\mu$ m ID, 20 mm length, 3  $\mu$ m particle size (Thermo Scientific) and separated into a  
205 Repronil-Pur 120 C18-AQ, 3  $\mu$ m (Dr. Maisch) self-packed column (75 $\mu$ m ID, 49 cm length) at a  
206 flow rate of 250 nL/min. Peptide elution was achieved with 105 min gradient from 5% to 55% of  
207 mobile phase B (A: 0.1% formic acid; B: 0.1% formic acid in 80% acetonitrile). The mass  
208 spectrometer was operated in data-dependent acquisition mode with automatic switching  
209 between MS and MS/MS scans. The full MS scans were acquired at 70K resolution with  
210 automatic gain control (AGC) target of  $1 \times 10^6$  ions between  $m/z = 200$  to 2000 and were  
211 surveyed for a maximum injection time of 100 milliseconds (ms). Higher-energy collision  
212 dissociation (HCD) was used for peptide fragmentation at normalized collision energy set to 30.  
213 The MS/MS scans were performed using a data-dependent top12 method at a resolution of  
214 17.5K with an AGC of  $1 \times 10^5$  ions at a maximum injection time of 50 ms and isolation window  
215 of 2.0  $m/z$  units. A dynamic exclusion list with a dynamic exclusion duration of 45 s was applied.

## 216 **LC-MS/MS data analysis**

217 LC-MS/MS data analysis was performed in accordance to the PatternLab for proteomics 4.0  
218 software (<http://www.patternlabforproteomics.org>) data analysis protocol [27]. The proteome  
219 (n=3993 proteins) from *M. tuberculosis* (Reference strain ATCC 25618/H37Rv UP000001584)  
220 was downloaded from Uniprot (March 2017) (<https://www.uniprot.org/proteomes/>). A target-  
221 reverse data-base including the 123 most common contaminants was generated using  
222 PatternLab's database generation tool. Thermo raw files were searched against the database  
223 using the integrated Comet [28] search engine (2016.01rev.3) with the following parameters:  
224 mass tolerance from the measured precursor m/z(ppm): 40; enzyme: trypsin, enzyme  
225 specificity: semi-specific, missed cleavages: 2; variable modifications: methionine oxidation;  
226 fixed modifications: carbamidomethylation of cysteine. Peptide spectrum matches were then  
227 filtered using PatternLab's Search Engine Processor (SEPro) module to achieve a list of  
228 identifications with less than 1% of false discovery rate (FDR) at the protein level [29]. Results  
229 were post-processed to only accept peptides with six or more residues and proteins with at least  
230 two different peptide spectrum matches. These last filters led to an FDR at the protein level, to  
231 be lower than 1% for all search results. Proteins were further grouped according to a maximum  
232 parsimony criteria in order to identify protein clusters with shared peptides and to derive the  
233 minimal list of proteins [30]. Spectrum counts of proteins identified in each technical replicate  
234 were statistically compared with unpaired Mann-Whitney test.

235 For the O-glycosylation analysis raw files were searched against the same database using the  
236 parameters described above with the addition of the following variable modifications in S or T  
237 amino acid residues: Hex =162.052824 Da, Hex-Hex=324.1056 Da, Hex-Hex-Hex=486.1584 Da,  
238 Pentose=132.042259 Da, Heptose=192.0633 Da, DeoxyHex=146.0579 Da. Monoisotopic mass of  
239 each neutral loss modification was defined in Comet search engine according to the values  
240 recorded in Unimod public domain database (<http://www.unimod.org/>). Each O-glycosylation  
241 was tested independently and a maximum of 2 modifications per peptide was allowed.

242 Peptide spectrum matches were filtered and post-processed using SEPro module, using the  
243 same parameters as described above and proteins were grouped according to a maximum  
244 parsimony criteria [30].

## 245 **Protein analysis**

246 Identified proteins in each replicate were compared by area-proportional Venn Diagram  
247 comparison (BioVenn [31]) and a list of common proteins was generated. Further analysis only  
248 considered proteins present in both replicates of LC MS/MS analysis. SEPro module retrieved a  
249 list of protein identified with Uniprot code. Molecular weight, length, complete sequence, gene  
250 name and *M. tuberculosis* locus identified (Rv) was obtained using the Retrieve/ID mapping Tool  
251 of Uniprot website (<https://www.uniprot.org/uploadlists/>) [32]. Protein functional category was  
252 obtained by downloading *M. tuberculosis* H37Rv genome sequence Release 3 (2018-06-05) from  
253 Mycobrowser website (<https://mycobrowser.epfl.ch/>) [33].

## 254 **Protein O-glycosylation analysis**

255 Proteins bearing O-glycosylated peptides in both replicates were compared by area-  
256 proportional Venn Diagram comparison (BioVenn [31]) and a list of common glycosylated  
257 proteins for each of the analyzed modifications, i.e. Hex, Hex-Hex, Hex-Hex-Hex, Pentose,  
258 Heptose, DeoxyHex, was generated. Further analysis was manually performed in order to  
259 identify common modified peptides in the list of common glycosylated proteins, as well as  
260 common modifications (as 1 peptide could contain up to two modifications). As a result of this  
261 analysis a list of proteins with common modifications was generated, consisting in proteins  
262 having the same modified peptide in both replicates. This list of O-glycosylated proteins was  
263 considered for subsequent analysis.

## 264 **Signal peptide prediction**

265 In order to identify potentially secreted proteins, the SignalP 5.0 Server  
266 (<http://www.cbs.dtu.dk/services/SignalP/>) was used to detect the presence of N-terminal signal  
267 sequences in the analyzed set of proteins. The organism group selected was gram-positive  
268 bacteria. This version of the Server, recently launched, can predict proteome-wide signal  
269 peptides across all organisms, and classify them into three type of signal peptides: Sec/SPI (SP),  
270 Sec/SPII (LIPO) and Tat/SPI (TAT) [34]. In the output produced by the server one annotation is  
271 attributed to each protein, the one that has the highest probability. The protein can have a Sec  
272 signal peptide (Sec/SPI), a Lipoprotein signal peptide (Sec/SPII), a Tat signal peptide (Tat/SPI) or  
273 No signal peptide at all (Other). If a signal peptide is predicted, the cleavage site (CS) position is  
274 also reported.

## 275 **Estimation of protein abundance and comparative analysis**

276 To estimate protein abundance Normalized Spectral Abundance Factor (NSAF) calculated with  
277 PatternLab for proteomics software was considered. NSAF allows for the estimation of protein  
278 abundance by dividing the sum of spectral counts for each identified protein by its length, thus  
279 determining the spectral abundance factor (SAF), and normalizing this value against the sum of  
280 the total protein SAFs in the sample [35,36]. Proteins were ordered according to their NSAF,  
281 from more to less abundant. NSAF values corresponding to percentile 75th, 90th and 95th were  
282 calculated, and the groups of proteins above these values were identified as P75%, P90% and P95%  
283 proteins, respectively. The list of proteins obtained in this study was compared with other  
284 proteomic studies [7,13,37] by Venn Diagram comparison (Venny 2.1, BioinfoGP [38]) and NSAF  
285 of proteins identified in all studies, 3 studies, 2 studies or only this study were statistically  
286 compared with unpaired Mann-Whitney test. The protein abundance determined for CFP  
287 identified in this study (NSAF) was compared with the protein abundance calculated for *M.*

288 *tuberculosis* proteins identified in a previous study using the exponentially modified protein  
289 abundance index (emPAI) [13].

## 290 **Protein classification**

291 Gene Ontology (GO) analysis of the culture filtrate proteins was performed with David Gene  
292 Functional Classification Tool [39,40] using the Cellular Component Ontology database and *M.*  
293 *tuberculosis* H37Rv total proteins as background. With this analysis principal categories of  
294 enriched terms ( $p < 0.05$ ) for P75%, P90%, P95% and total proteins were determined. Functional  
295 classification of culture filtrate proteins was performed according to functional categories of *M.*  
296 *tuberculosis* knowledge database (Mycobrowser [33]).

297 Proteins with O-glycosylation modifications were analyzed with David Gene Functional  
298 Classification Tool [39,40] using Cellular Component, Biological Processes and Molecular  
299 functions Ontology database and *M. tuberculosis* H37Rv total proteins as background.

## 300 **O-glycosylation validation**

301 The same analytical workflow described previously for LC-MS/MS analysis of O-glycosylation in  
302 our data was performed using the raw data files deposited at the ProteomeXchange Consortium  
303 with the dataset identifier PXD000111 [37]. This analysis was performed in order to validate the  
304 modified peptides identified in our work against additional biological replicates obtained in a  
305 previous work that extensively characterized culture filtrate proteins of *M. tuberculosis* H37Rv  
306 [37]. Additionally, some relevant scans corresponding to glycosylated peptides were searched  
307 in Mascot Server MS/MS Ions Search (Mascot, Matrix Science Limited [41]). Search was  
308 performed against NCBIprot (AA) database of all taxonomies. Search parameters were defined  
309 as peptide mass tolerance:  $\pm 10$  ppm, MS/MS mass tolerance:  $\pm 0.15$  Da, enzyme: semiTrypsin,  
310 fixed modifications: Carbamidomethyl (C), variable modifications: Hex (ST), Hex(2) (ST), Hex(3)  
311 (ST), Pent (ST), Hept (ST) or dHex (ST), according to the searched peptide. Other parameters  
312 were set to default values.

## 313 Results and Discussion

### 314 ***M. tuberculosis* culture filtrate proteins quality evaluation**

315 *M. tuberculosis* H37Rv was cultured following a classical method using Sauton minimal medium,  
316 a synthetic protein-free culture medium compatible with proteomic downstream analysis [8].  
317 Culture filtrate proteins (CFP), obtained after culture centrifugation and filtration, were  
318 concentrated by ultrafiltration and quantitated previous to further analysis. Four different  
319 batches of CPF were analyzed by gel electrophoresis and silver nitrate staining. As similar  
320 patterns were observed with the different CFP preparations a composed sample was prepared.  
321 The composed CFP sample was separated and resolved by 1D and 2D gel electrophoresis. In 1D  
322 SDS-PAGE an electrophoretic pattern showing a variety of proteins from approx. 10 kDa to 100  
323 kDa was observed (Fig 1A). In the case of 2D gel electrophoresis analysis, two experiments were  
324 run in parallel, one for silver nitrate staining (Fig 1B) and the other for western blot analysis using  
325 anti-CFP rabbit polyclonal antibodies to identify principal immunogenic proteins (Fig 1C).  
326 Immune recognition pattern of CFP proteins observed with anti-CFP rabbit polyclonal antibody  
327 was confirmed with an additional anti-CFP polyclonal antibody (NR-13809, BEI Resources).

328

#### 329 **Fig 1. Analysis of *M. tuberculosis* CFP by electrophoresis and western blot.**

330 (A) *M. tuberculosis* CFP analysis by 1D SDS-PAGE 15% and silver nitrate staining. Two different batches  
331 (lanes 1 and 2, 1.8 and 2.1 ug, respectively) and a composed and concentrated sample of both batches  
332 (lane 3, 12 ug) were loaded. Bands selected for MALDI-TOF/TOF mass spectrometry are indicated as H1,  
333 H2, H3 and H4. MWM: Molecular weight marker (Thermo Fischer Scientific, # 26616). (B) *M. tuberculosis*  
334 CFP analysis by 2D electrophoresis and silver nitrate staining. *M. tuberculosis* CFP composed sample (50  
335 ug) was loaded. Immunoreactive spots selected for MALDI-TOF/TOF mass spectrometry are indicated with  
336 numbers. MWM: Molecular weight marker (Thermo Fischer Scientific, # 26616). (C) Western blot analysis  
337 of *M. tuberculosis* CPF. 2D gel performed equally as (B) was transferred to Protran 0.45 uM NC (GE

338 Healthcare) and probed with rabbit anti-CFP antibody. Immunoreactive zones are indicated with a  
339 rectangle in the corresponding 2D gel.

340

341 As shown in Fig 1B most of the spots consisted of proteins with an isoelectric point below 6.5,  
342 as was previously reported by others [7,8,42,43]. Some immunoreactive spots detected in 2D  
343 western blot were overlapped with 2D gel silver nitrate stained to select candidates to be  
344 analyzed by mass spectrometry (Fig 1C). By this MS analysis 12 different proteins of *M.*  
345 *tuberculosis* (MTB) were identified in the CFP sample (Table 1) as well as some low-signal  
346 contaminant keratin peptides. Molecular weight of identified MTB proteins showed a good  
347 correlation with the relative molecular weight of selected band or spot (Table 1).

348

349 **Table 1. *M. tuberculosis* proteins identified by MALDI-TOF (MS/MS) from 1D and 2D SDS**  
350 **polyacrylamide electrophoresis.**

| Band / spot | Protein                                                                                 | Molecular weight | Gene name                                                               | Gene identifier                                                                      | Proteomics       | Functional category                     |
|-------------|-----------------------------------------------------------------------------------------|------------------|-------------------------------------------------------------------------|--------------------------------------------------------------------------------------|------------------|-----------------------------------------|
| H1          | Conserved protein with FHA domain, GarA                                                 | 17,2 kDa         | <i>garA</i>                                                             | <b>Rv1827</b>                                                                        | CF, CYT, CW, MF. | Conserved hypothetical                  |
| H1          | Adenylate kinase Adk (ATP-AMP transphosphorylase)                                       | 20,0 kDa         | <i>adk</i>                                                              | <b>Rv0733</b>                                                                        | CF, CYT, MF.     | Intermediary metabolism and respiration |
| H1          | Superoxide dismutase [FE] SodA                                                          | 23,0 kDa         | <i>sodA</i>                                                             | <b>Rv3846</b>                                                                        | CF, CYT, MF.     | Virulence, detoxification, adaptation   |
| H2          | Conserved protein TB18.6                                                                | 18,6 kDa         | TB18.6                                                                  | <b>Rv2140c</b>                                                                       | CF, MF.          | Conserved hypotheticals                 |
| H2          | Probable thiol peroxidase Tpx                                                           | 16,8 kDa         | <i>tpx</i>                                                              | <b>Rv1932</b>                                                                        | CF, CYT, MF.     | Virulence, detoxification, adaptation   |
| H3          | 10 kDa chaperonin GroES                                                                 | 10,8 kDa         | <i>groES</i>                                                            | <b>Rv3418c</b>                                                                       | CF, CYT, CW, MF. | Virulence, detoxification, adaptation   |
| H3/1/2/6    | Heat shock protein HspX (alpha-crystallin homolog)                                      | 16,2 kDa         | <i>hspX</i>                                                             | <b>Rv2031c</b>                                                                       | CF, CYT, CW, MF. | Virulence, detoxification, adaptation   |
| H4/1/6      | 10 kDa culture filtrate antigen EsxB                                                    | 10,8 kDa         | <i>esxB</i>                                                             | <b>Rv3874</b>                                                                        | CF, CYT, MF.     | Cell wall and cell processes            |
| 1/2/3/4     | ESAT-6 like protein (Identification could correspond to EsxJ, EsxK, EsxM, EsxP or EsxW) | ≅ 10 kDa         | <i>esxJ</i><br><i>esxK</i><br><i>esxM</i><br><i>esxP</i><br><i>esxW</i> | <b>Rv1038c</b><br><b>Rv1197</b><br><b>Rv1792</b><br><b>Rv2347c</b><br><b>Rv3620c</b> | CF*              | Cell wall and cell processes            |
| 2           | Thioredoxin TrxC (TRX) (MPT46)                                                          | 12.5 kDa         | <i>trxC</i>                                                             | <b>Rv3914</b>                                                                        | CF, CYT, CW, MF. | Intermediary metabolism and respiration |
| 5           | Secreted antigen 85-a FbpA (mycolyl transferase 85A)                                    | 35.7 kDa         | <i>fbpA</i>                                                             | <b>Rv3804c</b>                                                                       | CF, CYT, CW, MF. | Lipid metabolism                        |
| 6           | Rv3747                                                                                  | 13.5 kDa         | Rv3747                                                                  | <b>Rv3747</b>                                                                        | MF               | Conserved hypotheticals                 |

351 CF: Culture filtrate, CYT: Cytosol, CW: Cell Wall, MF: Membrane fraction, \* Putative (EsxK, EsxM),

352 reported (EsxJ, EsxW), not reported (EsxP). Table filled with information obtained from Ref [33].

353

354 All proteins identified by this approach were previously detected in other proteomic studies,

355 and most of them (11 out of 12) were identified in the culture filtrate fraction by at least one

356 earlier proteomic report [33]. Besides, 3 proteins were identified in at least 3 different bands or

357 spots, reflecting the fact that these proteins could be highly represented in CFP. These are heat

358 shock protein HspX (Rv2031c), 10 kDa culture filtrate antigen EsxB (Rv3874) and a group of

359 indistinguishable proteins (ESAT-6 like proteins). As proteins of this group - EsxJ (Rv1038c), EsxK

360 (Rv1197), EsxM (Rv1792), EsxP (Rv2347c) and EsxW (Rv3620c) - are 98 amino acids long and



361 differ in only 1 or two amino acids, the unequivocal identification of each one is hindered.  
362 Proteins of ESAT-6 like group were identified in a common zone of the 2D gel (spots 1 to 4),  
363 suggesting that each spot could correspond to a slightly different protein isoform.  
364 These results indicated that the *M. tuberculosis* H37Rv CFP preparation provides a good  
365 representation of the secreted/shed proteins because many main proteins of MTB were  
366 identified, with minimal contamination of non-MTB proteins (only a few peptides of human  
367 keratin were detected). Proteins highly recognized by anti-CFP antibodies (HspX, EsxB and  
368 Secreted antigen 85-a FbpA (Rv3804c)) are relevant pathogen antigens [33,44], recognized as  
369 secreted proteins by others [8,13], and evaluated as pathogen-derived biomarkers for active  
370 tuberculosis diagnosis [9].

## 371 **Characterization of CFP using LC MS/MS**

372 Although 2D gel electrophoresis coupled with MALDI TOF/TOF analysis is an extremely powerful  
373 tool to dissect and resolve multiprotein complexes, it is a low performance methodology for  
374 proteomic analysis, which needs a laborious and systematic approach in order to get confident  
375 and sensitive identification of proteins present in complex samples. Our results showed that this  
376 analysis generated several cases of redundant identifications. Thus, after quality confirmation  
377 of the sample, a high throughput analysis was performed using a shotgun quantitative approach  
378 based on a liquid nano-HPLC and tandem mass spectrometry workflow. In this experiment the  
379 proteins present in two technical replicates were resolved in SDS-PAGE and different portions  
380 of the gel were further selected for LC MS/MS analysis (S1A Fig). A gross initial quantitative  
381 comparison of spectrum counts of both datasets showed that there were not statistical  
382 differences among both replicates (S1B Fig). In CFP(1) 1450 different proteins were identified  
383 (corresponding 1427 to MTB, 19 to common contaminants and 4 to reverse sequences, resulting  
384 in a 0.28% FDR), whereas in CFP(2) 1453 different proteins were identified (1429 MTB proteins,  
385 18 contaminants and 6 reverse sequences (0.41% FDR)). The list of proteins of each replica is

386 available in S1 Table. The mass spectrometry proteomics data (raw data and search files) have  
387 been deposited at the MassIVE repository with the dataset DOI: doi:10.25345/C5PW8Q.  
388 The qualitative comparison of both datasets using a Venn Diagram bioinformatic tool showed  
389 that 1314 MTB proteins (92%) were shared between both replicates (S1C Fig). All proteins  
390 previously identified in the CFP sample by gel electrophoresis and MALDI-TOF/TOF were  
391 detected in both replicates characterized by LC MS/MS. The full list of 1314 common proteins,  
392 which was used for further analysis, is provided in S1 Table. Proteins showed a wide distribution  
393 of molecular weights, however most of them were of low molecular weight (median 31.97 kDa,  
394 Q1 21.25 kDa, Q3 46.50 kDa), which was consistent with the profile observed in Fig 1A and 1B.  
395 Previous research has shown that the vast majority of protein spots resolved in 2D gel  
396 electrophoresis of *M. tuberculosis* H37Rv CFP were found in the molecular weight range of 6–70  
397 kDa [8]. Moreover, consistent with our results, proteins identified by LC-MS/MS in a well  
398 characterized CFP, showed that the majority of the proteins were found in the 10-50 kDa range,  
399 with an average theoretical mass of 31.0 kDa [7].

## 400 **Protein classification using a quali-quantitative analysis**

401 Quantitative proteomics based on spectral counting methods are straightforward to employ and  
402 have been shown to correctly detect differences between samples [45]. In order to consider  
403 sample-to-sample variation obtained when carrying out replicate analyses, and due to the fact  
404 that longer proteins tend to have more peptide identifications than shorter proteins, Patternlab  
405 for Proteomics software uses NSAF (Normalized spectral abundance factor) [46] for spectral  
406 counting normalization. The NSAF for a protein is the number of spectral counts (SpC, the total  
407 number of MS/MS spectra) identifying a protein, divided by the protein's length (L), divided by  
408 the sum of SpC/L for all N proteins in the experiment. NSAF was shown to yield the most  
409 reproducible counts across technical and biological replicates [35]. Using the sum of NSAF of  
410 both replicates (Total NSAF, included in S1 Table) the common list of CFP was ordered according

411 to protein abundance and arbitrarily grouped in 4 subgroups (P95%, P90%, P75% and total CFP),  
412 consisting of 66, 132, 329 and 1314 proteins, respectively. P95% comprised proteins above 95th  
413 percentile NSAF, thus representing the most abundant proteins in the sample. P90% and P75%  
414 comprised proteins above 90th and 75th percentile, respectively. These subgroups of proteins  
415 were functionally classified using Gene Ontology, Cellular Component analysis, and principal  
416 categories of enriched terms ( $p < 0.05$ ) were determined (Fig 2A). Considering the subgroup of  
417 total CFP proteins 4 principal categories (cell wall, cytoplasm, extracellular region and plasma  
418 membrane) were similarly enriched (fold change 1.5, 1.5, 1.2 and 1.1, respectively). However,  
419 when considering the subgroups of more abundant proteins, the categories cell wall and  
420 extracellular region showed a marked increase of fold enrichment with protein abundance,  
421 achieving these categories in P95% subgroup a fold enrichment of 2.9 ( $p = 8.3e-18$ ) and 3.1  
422 ( $p = 2.0e-8$ ), respectively. This tendency was not observed in cytoplasm and plasma membrane  
423 categories.

424

425 **Figure 2. Quali-quantitative protein classification.**

426 (A) Fold change of principal categories of enriched terms ( $p < 0.05$ ) obtained analyzing common proteins  
427 of both replicates with David Gene Functional Classification Tool [39,40] using the Cellular Component  
428 Ontology database and *M. tuberculosis* H37Rv total proteins as background. Proteins were ordered  
429 considering normalized spectral abundance factor (NSAF) and percentile 75th, 90th and 95th NSAF were  
430 calculated. Fold change of the lists above each defined percentile (P75%, P90% and P95% proteins) analyzed  
431 using the same approach is shown. (B) Functional categories of CFP according to *M. tuberculosis*  
432 knowledge database (Mycobrowser [33]). Bars represent number of proteins corresponding to each  
433 category (number is indicated above each bar, scale in left axe) and dots represent mean NSAF of proteins  
434 in each category (scale is indicated in right axe).

435

436 The results presented showed that CFP proteins prepared in this work besides containing  
437 extracellular and cell wall proteins also include some cytoplasmatic and membrane proteins.

438 This observation should be relativized considering the fact that many CFP were classified with  
439 more than one ontology term, thus redundant information of cellular component could be  
440 obtained. Particularly, 183 proteins were classified as extracellular, but only 44 contained  
441 exclusively this ontology term. Besides, only 125 proteins were classified as exclusively  
442 cytoplasmatic, out of 463 proteins containing this ontology term. It is also important to note  
443 that 394 proteins had no assigned GO term. Taken this into account the analysis performed  
444 considering the abundance of each CFP protein in terms of NSAF could be more indicative of the  
445 actual composition of the sample. In that regard, our analysis indicates that the subgroups of  
446 more abundant proteins contained mainly proteins of extracellular region and cell wall  
447 compartment.

448 The annotated *M. tuberculosis* H37Rv proteins have been classified into 12 distinct functional  
449 categories in the *M. tuberculosis* knowledge database (Mycobrowser [33]). Functional  
450 classification of proteins identified in this study according to this classification showed that  
451 proteins were distributed across ten of those functional groups (Fig 2B). Most of the identified  
452 proteins are involved in intermediary metabolism and respiration (35.9%). However, when  
453 protein abundance is considered, the category with higher protein mean NSAF is virulence,  
454 detoxification, adaptation followed by cell wall and cell processes (Fig 2B).

455 Finally, considering the need of pathogen-derived biomarker validation for *M. tuberculosis*  
456 active diagnosis, we looked in the list of CFP for principal protein antigens detected in clinical  
457 samples [9], confirming the presence of 11 out of 12. Moreover, these putative biomarkers  
458 exhibited on average a high NSAF, being 10 of them in the P90% subgroup: GroEL2 (Rv0440), EsxA  
459 (Rv3875), HspX (Rv2031c), FbpA (Rv3804c), FbpB (Rv1886c), Mpt64 (Rv1980c), PstS1 (Rv0934),  
460 GlcB (Rv1837c), Apa (Rv1860) and FbpC (Rv0129c).

## 461 Prediction of secreted proteins

462 Given the results obtained the question arises whether the presence of certain proteins in CFP  
463 is due to bacterial leakage/autolysis in combination with high levels of protein expression and  
464 extracellular stability, rather than to protein-specific export mechanisms. *M. tuberculosis* H37Rv  
465 reference proteome (UP000001584) obtained from UniProt and our list of proteins from culture  
466 filtrate was submitted to SignalP 5.0 signal peptide prediction [34]. This method incorporates  
467 deep recurrent neural network-based approach that improves signal peptide (SP) prediction  
468 across all domains of life and distinguishes between three types of prokaryotic SPs, i.e., SP  
469 (Sec/SPI): standard secretory signal peptides transported by the Sec translocon and cleaved by  
470 Signal Peptidase I, Sec/SPII (LIPO): lipoprotein signal peptides transported by the Sec translocon  
471 and cleaved by Signal Peptidase II and Tat/SPI (twin-arginine translocation pathway, TAT): signal  
472 peptides transported by the Tat translocon and cleaved by Signal Peptidase I. A total of 392  
473 proteins were predicted to have one of these types of signal peptide in *M. tuberculosis* proteome  
474 (207 SP, 113 LIPO and 72 TAT). Of those we identified 140 in CFP (62 SP, 53 LIPO and 25 TAT),  
475 being many of them well recognized secreted proteins, particularly FbpA (Rv3804c), FbpB  
476 (Rv1886c), FbpC (Rv0129c), Apa (Rv1860), Mpt64 (Rv1980c), PstS1 (Rv0934), LpqH (Rv3736),  
477 among others (S2 Table).

478 This approach allowed for the identification of proteins targeted to the signal-sequence-  
479 dependent secretory pathways. To export proteins across its unique cell wall, mycobacteria  
480 utilize the general secretion pathways, twin-arginine transporter, and up to five distinct ESX  
481 secretion systems (designated ESX-1 through ESX-5, referred to as the type VII secretion system:  
482 T7SS), which various functions in virulence, iron acquisition, and cell surface decoration [14].  
483 The ESX-1 system was the first of the T7SS to be identified and is responsible for the secretion  
484 of EsxA (6 kDa early secretory antigenic target, ESAT-6, Rv3875) and EsxB (Rv3874) [47]. It is  
485 important to note that proteins belonging to ESX secretion systems gene clusters as well as  
486 closely related PE and PPE gene families are *M. tuberculosis* secreted proteins that do not have

487 classical secretion signals [15,48]. Taken this into consideration, we identified in CFP several  
488 proteins of ESAT-6 family: EsxA (Rv3875), EsxB (Rv3874), EsxG (Rv0287), EsxI (Rv1037c), EsxK  
489 (Rv1197) grouped with EsxP (Rv2347c) and EsxJ (Rv1038c), EsxL (Rv1198), EsxN (Rv1793)  
490 grouped with EsxV (Rv3619c), EsxO (Rv2346c) and EsxW (Rv3620c). None of those were  
491 predicted by SignalP to contain a signal peptide. Besides, various proteins of ESX-1 secretion  
492 system detected in this analysis were not predicted to have a signal peptide, including EspA  
493 (Rv3616c), EspD (Rv3614c), EspC (Rv3615c) and EspB (Rv3881c). All of them count with  
494 experimental evidence of being secreted [32]. Finally, we detected 8 PE and PPE family proteins  
495 in our sample, from which 3 were predicted to have a signal peptide, i.e., PE13 (Rv1195), PE5  
496 (Rv0285) and PE15 (Rv1386) and 5 were not predicted to have a signal peptide, i.e., PE25  
497 (Rv2431c), PE31 (Rv3477), PPE41 (Rv2430c), PPE18 (Rv1196) and PPE60 (Rv3478). In particular,  
498 PE25 and PPE41 form a heterodimer that is secreted by the ESX-5 system of *M. tuberculosis* [49].  
499 In summary, various proteins with signal peptides were detected in our sample and several other  
500 proteins related to T7SS were identified. The SignalP 5.0 server was a suitable approach in order  
501 to predict secreted proteins with classical signal peptides but it has limitations to analyze  
502 proteins bearing non-classical secretion signals.

### 503 **Integrative analysis with previous proteomic studies**

504 In order to get more information on the results obtained and validate them, former research  
505 studies, which used different and complementary approaches to characterize *M. tuberculosis*  
506 *H37Rv* CFP, were compared against our results. We selected relevant previous proteomic studies  
507 reporting a similar methodology of mycobacterial culture and CFP preparation [7,13,37]. Malen  
508 *et al.* characterized a culture filtrate of *M. tuberculosis* H37Rv, considerably enriched for  
509 secreted proteins, with two complementary approaches (i) 2D gel electrophoresis combined  
510 with MALDI-TOF MS and (ii) LC coupled MS/MS. Peptides derived from a total of 257 proteins  
511 were identified, of which 254 were annotated with an Rv identifier [7]. Later, de Souza *et al.*

512 using nano-LC in tandem with an Orbitrap mass spectrometer performed a proteomic screening  
513 to identify proteins in culture filtrate, membrane fraction and whole cell lysate of  
514 *Mycobacterium tuberculosis*. Through this approach they identified 2182 different proteins in  
515 the different fractions, specifically 458 proteins in CFP, 1447 in the membrane fraction and 1880  
516 in the whole cell lysate [13]. In a recent report, Albrethsen *et al.* used label-free LC-MS/MS of  
517 SDS-PAGE fractionated samples to investigate the culture filtrate proteome of *M. tuberculosis*  
518 H37Rv bacteria in normal log-phase growth and after 6 weeks of nutrient starvation. In total, in  
519 this study 1362 proteins were identified in six CFP samples analyzed (three log phase samples  
520 and three 6-week-starved CFP samples) [37]. The comparison of proteins identified in our  
521 analysis against the proteins identified in CFP of these former proteomic researches showed a  
522 common group of 122 proteins consistently detected (Fig 3A). Among these proteins, 41 belong  
523 to the P90% subgroup indicating that these are highly abundant proteins. The most important  
524 proteins of this common group include 10 kDa chaperonin GroES (Rv3418c), ESAT-6-like protein  
525 EsxB (Rv3874), 6 kDa early secretory antigenic EsxA (Rv3875), Chaperone protein DnaK (Rv0350),  
526 the secreted antigen 85 complex -85A (Rv3804c), 85B (Rv1886c) and 85C (Rv0129c)-, Glutamine  
527 synthetase GlnA1 (Rv2220), Immunogenic protein Mpt64 (Rv1980c), Superoxide dismutase  
528 SodA (Rv3846), Thioredoxin TrxA (Rv3914), Glycogen accumulation regulator GarA (Rv1827),  
529 Phosphate-binding protein PstS1 (Rv0934), Alanine and proline-rich secreted protein Apa  
530 (Rv1860) and various other ESAT-6 family proteins (EsxO Rv2346c, EsxL Rv1198, EsxG Rv0287).  
531 Moreover, 1073 proteins were shared between our set of proteins and the list reported by  
532 Albrethsen *et al.* [37], representing 81.7% of the proteins identified by us and confirming a  
533 strong concordance between both analysis.

534 The label free quantitative approach applied in this study was exploited to compare the  
535 abundance in our sample of proteins identified in all the studies included in the analysis (N=4)  
536 versus those proteins identified in 3 (N=3), 2 (N=2) or 1 study (only this study) (N=1). Fig 3B  
537 clearly shows that proteins identified in the four studies are on average more abundant than

538 proteins identified in the other groups analyzed. Moreover, proteins identified in at least 2  
539 studies (N=3 or N=2) are globally more abundant than proteins identified exclusively in the  
540 present work.

541

542 **Fig 3. Comparison of *M. tuberculosis* CFP with other relevant proteomic studies.**

543 (A) Analysis of *M. tuberculosis* CFP protein list (CFP TB: this study) versus other relevant proteomic studies  
544 of *M. tuberculosis* CPF, identified as CPF Malen [7], CPF de Souza [13] and CPF Albrethsen [37] by Venn  
545 Diagram comparison (Venny's on-line reference [38]). (B) Protein abundance estimation of proteins  
546 identified this study (CFP TB) and in all of the three other studies evaluated (N=4), in this study and in two  
547 other studies (N=3), in this study and in one other study (N=2), or only in this study (N=1). The arrow  
548 indicates the protein Rv3620c (esxW) that was identified in an additional study [8] not included in the  
549 comparison of Fig 3A. The star indicates the protein Rv3118 (sseC1) which has an identical (100% identity)  
550 second copy at Rv0814c (sseC2) which was identified in CFP Albrethsen [37]. p-value obtained after Mann-  
551 Whitney test comparison of the median of two groups is shown, and the groups compared in each case is  
552 indicated with a line above each graph.

553

554 Additional analysis comparing our data against the proteomic quantitative approach performed  
555 by de Souza *et al* [13] allowed us to identify a subgroups of highly represented proteins  
556 consisting of those identified in this work and also in the three fractions studied by this previous  
557 work, i.e. culture filtrate, membrane fraction and whole cell lysate. This subgroup accounted for  
558 43.2% of protein abundance expressed as NSAF in this work and 29.2% of emPAI calculated by  
559 the cited research. Besides, a group of 921 proteins identified in membrane fraction and/or  
560 whole cell lysate prepared by de Souza *et al* and accounting for 13.3 % of calculated emPAI was  
561 not detected in the culture filtrate prepared by them neither in CFP prepared in this study [13].  
562 These results are summarized in S3 Table.

563 As a whole these results show that the CFP prepared in the present work exhibited a good  
564 correlation with previous studies, both in terms of qualitative proteomic composition as well as



565 in relation to the quantitative estimation of protein abundance. Proteins highly represented in  
566 our sample are proteins either frequently identified by others using complementary approaches  
567 in culture filtrates of MTB, and thus confirming that our sample is enriched in proteins that the  
568 bacteria does secrete, or ubiquitously detected in different *M. tuberculosis* cellular fractions,  
569 indicating that these could represent highly expressed proteins.

570 Finally, with this approach 30 proteins not previously annotated with proteomic data in  
571 Mycobrowser website (Release 3 (2018-06-05)) [33] were identified (S4 Table). This list,  
572 principally composed by proteins classified as conserved hypotheticals, includes the ESX-3  
573 secretion-associated protein EspG3 (Rv0289) identified with 4 unique peptides in CFP(1) and 5  
574 unique peptides in CFP(2) and the Two component sensor histidine kinase DosT (Rv2027c)  
575 identified with 2 unique peptides in each replicate. Further comparison of these proteins with  
576 the results obtained in a proteome-wide scale approach based on SWATH mass spectrometry  
577 [50] allow us the identification, to the best of our knowledge, of 8 proteins without previous  
578 evidence of expression at the protein level. In S5 Table these proteins are listed as well as the  
579 scans of their corresponding peptides.

## 580 **O-glycosylation analysis**

581 To complement our analysis, the presence of the most common naturally occurring glycan  
582 residues in mycobacteria was analyzed: hexoses, like mannose, glucose or galactose, which are  
583 highly reported in mycobacterial lipoproteins [18], deoxyhexoses, like fucose and rhamnose,  
584 that are important components of the cell surface glycans [51], the pentose sugar arabinose also  
585 reported in some glycoproteins [18] and as part of the mycolyl-arabinogalactan-peptidoglycan  
586 of the cell wall [52], and heptoses, recognized to be transferred by heptosyltransferases using  
587 ADP-heptose [53]. Our rationale was that the nano LC MS/MS technology used in this work, by  
588 having more than four orders of magnitude intrascan dynamic range and a femtogram-level

589 sensitivity, would allow the direct identification of modified peptides, without previous affinity-  
 590 based strategies for glycosylated protein enrichment.  
 591 In each replica several O-glycosylation events were detected and after comparing them a  
 592 reduced subgroup of common peptides and proteins was defined and selected for further  
 593 analysis. O-glycosylation profile analysis revealed the presence of 154 common glycosylation  
 594 events in 135 common modified peptides in both replicas of MTB culture filtrate (Table 2). The  
 595 O-glycosylated common peptides were identified in 363 scans, consisting in at least 2 scans per  
 596 peptide (1 scan per replica) and a maximum of 8 scans in the case of Hex-Hex-Hex modification  
 597 of Alanine and proline rich secreted protein Apa (Rv1860) (S6 Table). The four studied  
 598 monosaccharide modifications (Hex, Pentose, DeoxyHex and Heptose) were highly similarly  
 599 represented in culture filtrate proteins, being Hex the most frequent modification (Table 2). In  
 600 many cases the unmodified peptide was identified along with the modified peptide, indicating  
 601 that glycosylated and unglycosylated proteins isoforms are present (S2 Fig), as was previously  
 602 reported for the conserved lipoprotein LprG [54].

604 **Table 2. O-glycosylation profile of *M. tuberculosis* culture filtrate proteins identified by LC**

605 **MS/MS**

| Modification       | Replica # 1           |                           |                       |                          | Replica #2            |                           |                       |                          | Comm<br>modif<br>protein |
|--------------------|-----------------------|---------------------------|-----------------------|--------------------------|-----------------------|---------------------------|-----------------------|--------------------------|--------------------------|
|                    | Modified Peptides (n) | Peptide FDR (% , n/N)     | Modified Proteins (n) | Protein FDR (% , n/N)    | Modified Peptides (n) | Peptide FDR (% , n/N)     | Modified Proteins (n) | Protein FDR (% , n/N)    |                          |
| <b>Hex</b>         | 268                   | <b>0.15</b><br>(27/17879) | 212                   | <b>0.94</b><br>(14/1494) | 107                   | <b>0.13</b><br>(22/16603) | 95                    | <b>0.99</b><br>(15/1509) | 36                       |
| <b>Hex-Hex</b>     | 94                    | <b>0.13</b><br>(22/17513) | 91                    | <b>0.95</b><br>(14/1467) | 72                    | <b>0.15</b><br>(25/16614) | 67                    | <b>0.99</b><br>(15/1511) | 23                       |
| <b>Hex-Hex-Hex</b> | 68                    | <b>0.14</b><br>(24/17635) | 62                    | <b>1.00</b><br>(15/1505) | 66                    | <b>0.12</b><br>(20/16716) | 57                    | <b>0.99</b><br>(15/1515) | 15                       |
| <b>Pentose</b>     | 280                   | <b>0.12</b><br>(22/17686) | 239                   | <b>0.96</b><br>(14/1458) | 128                   | <b>0.13</b><br>(21/16592) | 116                   | <b>1.00</b><br>(15/1507) | 39                       |
| <b>Heptose</b>     | 129                   | <b>0.15</b><br>(27/17507) | 121                   | <b>0.94</b><br>(14/1485) | 112                   | <b>0.15</b><br>(25/16566) | 104                   | <b>1.00</b><br>(15/1504) | 29                       |
| <b>DeoxyHex</b>    | 144                   | <b>0.13</b><br>(22/17587) | 125                   | <b>0.94</b><br>(14/1493) | 137                   | <b>0.16</b><br>(26/16638) | 125                   | <b>0.99</b><br>(15/1513) | 38                       |

606 FDR: False discovery rate, n: number, N: total number.

607

608 O-glycosylation modification were detected in 108 different MTB culture filtrate proteins, 52 of  
609 them presented at least 3 scans of the modified peptide and 12 bore more than one of the  
610 searched modifications, i.e. Apa (Rv1860), EsxA (Rv3875), LpqH (Rv3763), LppO (Rv2290), CarB  
611 (Rv1384), AceE (Rv2241), FhaA (Rv0020c), PstS1 (Rv0934), LprF (Rv1368), DsbF (Rv1677), Mpt64  
612 (Rv1980c) and DevR (Rv3133c) (Fig 4A). What is interesting to highlight is the high number of  
613 scans of modified peptides corresponding to Apa (Rv1860), most of them corresponding to Hex,  
614 Hex-Hex or Hex-Hex-Hex. This protein, also known as immunogenic protein MPT32 or 45-kDa  
615 glycoprotein is a largely characterized secreted mannosylated glycoprotein [55] and in  
616 agreement with previous reports we found scans corresponding to the presence of one, two or  
617 three hexoses between T313, T315, T316 and T318 as glycosylation sites [21]. It is currently  
618 believed that mannosylated proteins can act as potential adhesins and it was demonstrated that  
619 Apa is associated with the cell wall and binds lung surfactant protein A (SP-A) and other immune  
620 system C-TLs containing homologous functional domains [56]. The 19 kDa lipoprotein antigen  
621 precursor LpqH (Rv3763), also showing an important number of Hex-Hex and Hex-Hex-Hex  
622 modified peptides, is a well-known glycosylated protein exposed in the bacterial cell envelope,  
623 that was postulated to be used by mycobacteria to enable their entry into the macrophage  
624 through interaction with mannose receptors (MRs) of this host cells [57].

625

626 **Fig 4. Description of O-glycosylated proteins in *M. tuberculosis* CFP.**

627 (A) Scans of O-glycosylated peptides identified in MTB culture filtrate proteins. Each analyzed modification  
628 is displayed with a different bar color. Individual scans of both replicates were considered and only 52  
629 proteins identified by at least three different scans are shown in the graph. (B) Gene Ontology analysis of  
630 MTB culture filtrate glycoproteins. Principal categories of enriched terms ( $p < 0.05$ ) obtained analyzing  
631 proteins with common glycosylation in both replicates with David Gene Functional Classification Tool  
632 [39,40] using Molecular Functions, Biological Processes and Cellular Component Ontology database and  
633 *M. tuberculosis* H37Rv total proteins as background.

634

635 It is important to note that the precise O-glycosylation site assignment is hampered by the fact  
636 that collision energies used for peptide fragmentation cause the breakage of the weaker O-  
637 glycosidic bond leaving behind mostly unmodified fragments. Although the glycosylation site  
638 assignment was not the aim of our study, the utility XDScore of Patternlab for proteomics  
639 developed for statistical phosphopeptide site localization [58], was preliminary tested in our  
640 data. Glycosylation site p-value is presented in S6 Table.

641 Glycosylation plays a significant role in MTB adaptive processes and in particular cell-cell  
642 recognition between the pathogen and its host is mediated in part by glycosylated proteins.  
643 Based on the Gene Ontology (GO) analysis of the glycoproteins identified, cellular response to  
644 starvation, protein folding and pathogenesis were highly enriched biological processes. Our GO  
645 analysis further showed that most of the glycoproteins identified were localized in the cell wall  
646 and extracellular region and that phosphopantetheine binding (including Mas, Pks2, PpsD, Pks13  
647 and Pks5), 3-oxoacid CoA-transferase activity and oxygen sensor activity (DesV and DesR) were  
648 significantly enriched molecular function categories (Fig 4B).

## 649 **O-glycosylation validation**

650 Of the 108 identified glycoproteins 21 were identified as candidate glycoproteins in the lectin  
651 interacting enriched membrane protein using WGA-affinity capture [12]. Besides, 12  
652 glycoproteins bearing mono- or polyhexose modifications in our analysis have been included in  
653 a recent review of protein glycosylation and lipoglycosylation in *M. tuberculosis* [18], where  
654 experimental evidence was summarized. Among them several lipoproteins are included: LprA  
655 (Rv1270c), LprF (Rv1368), LppO (Rv2290), LpqH (Rv3763), PstS1 (Rv0934) and Mpt83 (Rv2873).  
656 Moreover, four of these proteins were consistently found with the same type of hexose O-  
657 glycosylation in culture filtrate of MTB, i.e. Apa (Rv1860), LppO (Rv2290), Rv2799 and Rv3491  
658 [21]. Our results confirm the presence of glycosylated lipoproteins in culture filtrate aiding to  
659 the growing evidence for glycosylation of mycobacterial lipoproteins [18,21]. Besides, we

660 identified mono- or polyhexose modifications in DsbF (Rv1677), a probable conserved  
661 lipoprotein. The same DsbF glycosylation pattern was reported in a recent glycoproteomic  
662 analysis of MTB cell lysates of four different lineages [17]. In this work 27 proteins of our list were  
663 also described as O-glycosylated, including HtrA (Rv1223), Wag31 (Rv2145c), FbpB (Rv1886c)  
664 and Rv2411c.

665 To further evaluate the reproducibility of our results and validate them we looked for O-  
666 glycosylated proteins in the raw data files deposited by Albrethsen *et al.* [37] at the  
667 ProteomeXchange Consortium. By means of this approach 22 proteins with the same O-  
668 glycosylation type were found and after peptide sequence comparison we confirmed 20  
669 modified peptides in common with our results, corresponding to 11 different proteins LprA  
670 (Rv1270c), DsbF (Rv1677), Rv1732c, Apa (Rv1860), AroE (Rv2552c), Rv2799, Mpt83 (Rv2873),  
671 SahH (Rv3248c), Rv3491, LpqH (Rv3763) and EsxA (Rv3875). The scans corresponding to these  
672 peptides are presented in S7 Table.

673 As a whole, we are reporting 62 novel O-glycosylated proteins including hexose, heptose,  
674 pentose or deoxyhexose, 10 of them being validated with raw data re-analysis of the selected  
675 previous work [37]. Several relevant scans corresponding to glycosylated peptides were  
676 statistically confirmed in Mascot Server MS/MS Ions Search against NCBIprot (AA) database of  
677 all taxonomies [41] (S3 Fig). Interestingly EsxA (Rv3875) was found with three different types of  
678 O-glycosylation - DeoxyHex, Pentose and Heptose – (Fig 4A). Of those the presence of two  
679 heptoses, one in T61 and the other in T63 was also identified in at least one replica of log phase  
680 culture filtrates in Albrethsen *et al.* [37] (S7 Table). A representative peptide spectrum of this  
681 modification including peptide ions fragment matches is shown in Fig 5. EsxA (Rv3875) and its  
682 chaperone protein EsxB (Rv3874), localized in Region of Difference 1 (RD1) of the MTB genome,  
683 are important virulence factors of MTB and the most immunodominant antigens thus far  
684 identified [59]. EsxA (or ESAT-6) is included in several vaccine candidates in development [60]  
685 and is also the core antigen in the IFN- $\gamma$  release assays (IGRA) used to diagnose latent infection

686 [61]. A former report described that an N-terminal Thr acetylation (+42Da) was identified in  
687 some species of this protein obtained in a short-term MTB culture filtrate [62] and other  
688 literature mentioned this protein as being glycosylated [17,63], however, to our knowledge, we  
689 are presenting novel evidence of several O-glycosylation events in this relevant secreted  
690 antigen.

691

692 **Fig 5. EsxA heptose-modified peptide spectra**

693 (A) Representative spectrum of EsxA heptose-modified peptide statistically confirmed by Mascot Server  
694 MS/MS Ions Search (HE = heptose). (B) Fragment ions matches indicated in bold red as reported in Mascot  
695 Server.

696

697

## 698 Conclusion

699 Membrane and exported proteins are crucial players for maintenance and survival of bacterial  
700 organisms in infected hosts, and their contribution to pathogenesis and immunological  
701 responses make these proteins relevant targets for medical research [11]. Consistently, various  
702 of the proteins identified in *M. tuberculosis* CFP were proposed as relevant mycobacterial  
703 virulence factors [64], putative active infection biomarkers [9] or vaccine candidates [60,65].

704 This shotgun proteomic approach allowed a deep comprehension of *M. tuberculosis* H37Rv  
705 culture filtrate proteins reporting proteomic evidence in this sub-fraction for 1314 proteins. In  
706 that sense it is important to note that although this method is highly sensitive, specificity was  
707 prioritized by selecting as post-processing criteria that considered only proteins with at least  
708 two different peptide spectrum matches.

709 In addition to proteins that have not been previously reported in *M. tuberculosis* H37Rv CFP, we  
710 also found proteins consistently detected in previous proteomic studies which were further  
711 confirmed as highly abundant proteins. Many of these proteins were previously described in  
712 culture filtrates of MTB or detected in different *M. tuberculosis* cellular fractions, including  
713 membrane fraction and whole cell lysate. This could suggest that two complementary pathways  
714 are accounting for our observations. On one hand, the abundance of certain proteins in CFP  
715 appear to be truly related to protein-specific export mechanisms, while on the other hand the  
716 occurrence of some proteins in CFP due to bacterial autolysis in combination with high levels of  
717 protein expression and extracellular stability cannot be ruled out. Nevertheless, the GO ontology  
718 Cellular Component analysis and the integrative analysis performed with relevant research  
719 papers confirms that our sample is indeed enriched in proteins that the bacteria secretes to the  
720 extracellular space.

721 Supporting this, we could identify several proteins with predicted N-terminal signal peptide  
722 indicating that these are targeted to the secretory pathways [66], as well as various proteins

723 belonging to the ESX secretion systems, and PE and PPE families known to be secreted by T7SS,  
724 but recognized as not to have classical secretion signals [48].

725 With the aim to assess the role of protein O-glycosylation in MTB virulence and host-pathogen  
726 interactions [16,18], this study described the identification of 154 glycosylation events in 108  
727 MTB proteins. In particular, several lipoproteins were found glycosylated in culture filtrate.  
728 Lipoproteins have been shown to play key roles in adhesion to host cells, modulation of  
729 inflammatory processes, and translocation of virulence factors into host cells [67]. The growing  
730 evidence of glycosylation of mycobacterial lipoproteins including the results presented here,  
731 indicates that glycosylation plays a significant role in the function and regulation of this group  
732 of proteins. Along with lipoproteins, other relevant glycoproteins identified were mainly  
733 involved in cellular response to starvation, protein folding and pathogenesis. As a novel  
734 contribution of this work, we are reporting that the virulence factor EsxA is glycosylated in MTB  
735 culture filtrate. It is important to note that in addition to EsxA other glycosylated proteins  
736 identified in this work have been proposed as diagnostic biomarkers for TB active disease.  
737 Protein glycosylation data presented here, including the coexistence of related protein  
738 glycoforms evidenced in this work, should be considered for designing antibody-based  
739 diagnostic test targeting *M. tuberculosis* antigens. Besides, as reported for other pathogens  
740 [68,69], protein glycosylation diversity could be a key mechanism to provide antigenic variability  
741 aiding in the immune subversion of this pathogen.

742 Our study provided an integrative evaluation of MTB culture filtrate proteins, bringing evidence  
743 of the expression of some proteins not previously detected at protein level, and confirming and  
744 enlarging the database of O-glycosylated proteins. This novel information may raise new  
745 questions on the role of protein O-glycosylation on the biology of MTB, as well as it will  
746 contribute to complement the knowledge of its relevant biomarkers, virulence factors and  
747 vaccine candidates.

748



## 749 Acknowledgments

750 We thank Rosario Duran (IIBCE/ Institut Pasteur de Montevideo, Uruguay) for critical reading of  
751 the manuscript and helpful discussion about LC MS/MS experiment design and data analysis.

752 We also thank Alejandro Leyva (Institut Pasteur de Montevideo, Uruguay) for technical  
753 assistance with Orbitrap mass spectrometer and Paulo C. Carvalho (Fiocruz, Brazil) for his  
754 valuable collaboration with data analysis in PatternLab for Proteomics. Finally, we would like to  
755 thank the staff of Comisión Honoraria de Lucha Antituberculosa y Enfermedades Prevalentes  
756 (Montevideo, Uruguay), for technical assistance with *M. tuberculosis* culture.

757

## 758 References

- 759 1. World Health Organization. Global Tuberculosis Report 2018. Geneva; 2018.
- 760 2. Meena LS, Rajni. Survival mechanisms of pathogenic *Mycobacterium tuberculosis*  
761 H37Rv. FEBS J. 2010 Jun;277(11):2416–27.
- 762 3. Ernst JD. Mechanisms of *M. tuberculosis* Immune Evasion as Challenges to TB Vaccine  
763 Design. Cell Host Microbe. 2018 Jul;24(1):34–42.
- 764 4. Chegou NN, Hoek KG, Kriel M, Warren RM, Victor TC, Walzl G. Tuberculosis assays: past,  
765 present and future. Expert Rev Anti Infect Ther. 2011 Apr 10;9(4):457–69.
- 766 5. Steingart KR, Flores LL, Dendukuri N, Schiller I, Laal S, Ramsay A, et al. Commercial  
767 serological tests for the diagnosis of active pulmonary and extrapulmonary  
768 tuberculosis: an updated systematic review and meta-analysis. PLoS Med.  
769 2011;8(8):e1001062.
- 770 6. Verma R, Pinto SM, Patil AH, Advani J, Subba P, Kumar M, et al. Quantitative Proteomic  
771 and Phosphoproteomic Analysis of H37Ra and H37Rv Strains of *Mycobacterium*  
772 tuberculosis. J Proteome Res. 2017 Apr 7;16(4):1632–45.

- 773 7. Malen H, Berven FS, Fladmark KE, Wiker HG. Comprehensive analysis of exported  
774 proteins from *Mycobacterium tuberculosis* H37Rv. *Proteomics*. 2007;7(10):1702–18.
- 775 8. Mattow J, Schaible UE, Schmidt F, Hagens K, Siejak F, Brestrich G, et al. Comparative  
776 proteome analysis of culture supernatant proteins from virulent *Mycobacterium*  
777 *tuberculosis* H37Rv and attenuated *M. bovis* BCG Copenhagen. *Electrophoresis*.  
778 2003;24(19–20):3405–20.
- 779 9. Tucci P, González-Sapienza G, Marin M. Pathogen-derived biomarkers for active  
780 tuberculosis diagnosis. *Front Microbiol*. 2014;5(OCT).
- 781 10. Niederweis M, Danilchanka O, Huff J, Hoffmann C, Engelhardt H. Mycobacterial outer  
782 membranes: in search of proteins. *Trends Microbiol*. 2010 Mar;18(3):109–16.
- 783 11. Daffé M, Etienne G. The capsule of *Mycobacterium tuberculosis* and its implications for  
784 pathogenicity. *Tuber Lung Dis*. 1999 Jun;79(3):153–69.
- 785 12. Bell C, Smith GT, Sweredoski MJ, Hess S. Characterization of the *Mycobacterium*  
786 *tuberculosis* Proteome by Liquid Chromatography Mass Spectrometry-based  
787 Proteomics Techniques: A Comprehensive Resource for Tuberculosis Research. *J*  
788 *Proteome Res*. 2012 Jan 30;11(1):119–30.
- 789 13. de Souza GA, Leversen NA, Malen H, Wiker HG. Bacterial proteins with cleaved or  
790 uncleaved signal peptides of the general secretory pathway. *J Proteomics*.  
791 2011;75(2):502–10.
- 792 14. Solomonson M, Setiাপutra D, Makepeace KAT, Lameignere E, Petrotchenko E V.,  
793 Conrady DG, et al. Structure of EspB from the ESX-1 type VII secretion system and  
794 insights into its export mechanism. *Structure*. 2015;23(3):571–83.
- 795 15. Shah S, Briken V. Modular Organization of the ESX-5 Secretion System in  
796 *Mycobacterium tuberculosis*. *Front Cell Infect Microbiol*. 2016;6(May):1–7.
- 797 16. van Els CACM, Corbière V, Smits K, van Gaans-van den Brink JAM, Poelen MCM,  
798 Mascart F, et al. Toward Understanding the Essence of Post-Translational Modifications

- 799 for the Mycobacterium tuberculosis Immunoproteome. *Front Immunol.* 2014;5:361.
- 800 17. Birhanu AG, Yimer SA, Kalayou S, Riaz T, Zegeye ED, Holm-Hansen C, et al. Ample  
801 glycosylation in membrane and cell envelope proteins may explain the phenotypic  
802 diversity and virulence in the Mycobacterium tuberculosis complex. *Sci Rep.* 2019 Dec  
803 27;9(1):2927.
- 804 18. Mehaffy C, Belisle JT, Dobos KM. Mycobacteria and their sweet proteins: An overview  
805 of protein glycosylation and lipoglycosylation in *M. tuberculosis*. *Tuberculosis.*  
806 2019;115:1–13.
- 807 19. VanderVen BC, Harder JD, Crick DC, Belisle JT. Export-mediated assembly of  
808 mycobacterial glycoproteins parallels eukaryotic pathways. *Science (80- ).* 2005 Aug  
809 5;309(5736):941–3.
- 810 20. Liu C-F, Tonini L, Malaga W, Beau M, Stella A, Bouyssie D, et al. Bacterial protein-O-  
811 mannosylating enzyme is crucial for virulence of Mycobacterium tuberculosis. *Proc Natl*  
812 *Acad Sci.* 2013 Apr 16;110(16):6560–5.
- 813 21. Smith GT, Sweredoski MJ, Hess S. O-linked glycosylation sites profiling in  
814 Mycobacterium tuberculosis culture filtrate proteins. *J Proteomics.* 2014 Jan  
815 31;97:296–306.
- 816 22. Ausubel Brent R., Kingston R. E., Moore D. D., Seidman J. G., Smith J. A. and Struhl K.  
817 FM. *Current protocols in molecular biology.* John Wiley and Sons, New York.; 1999.
- 818 23. Howard GC, Kaser MR. *Making and using antibodies : a practical handbook.* Taylor &  
819 Francis/CRC Press; 2013.
- 820 24. Lima A, Duran R, Schujman GE, Marchissio MJ, Portela MM, Obal G, et al.  
821 Serine/threonine protein kinase PrkA of the human pathogen *Listeria monocytogenes*:  
822 biochemical characterization and identification of interacting partners through  
823 proteomic approaches. *J Proteomics.* 2011;74(9):1720–34.
- 824 25. Rossello J, Lima A, Gil M, Rodríguez Duarte J, Correa A, Carvalho PC, et al. The EAL-

- 825 domain protein FcsR regulates flagella, chemotaxis and type III secretion system in  
826 *Pseudomonas aeruginosa* by a phosphodiesterase independent mechanism. *Sci Rep*.  
827 2017 Dec 31;7(1):10281.
- 828 26. Steinberg TH. Chapter 31 Protein Gel Staining Methods. In 2009. p. 541–63.
- 829 27. Carvalho PC, Lima DB, Leprevost F V, Santos MDM, Fischer JSG, Aquino PF, et al.  
830 PatternLab for proteomics 4.0: A one-stop shop for analyzing shotgun proteomic data.  
831 *Nat Protoc*. 2016 Jan 10;11(1):102–17.
- 832 28. Eng JK, Hoopmann MR, Jahan TA, Egertson JD, Noble WS, MacCoss MJ. A Deeper Look  
833 into Comet—Implementation and Features. *J Am Soc Mass Spectrom*. 2015 Nov  
834 27;26(11):1865–74.
- 835 29. Carvalho PC, Fischer JSG, Xu T, Cociorva D, Balbuena TS, Valente RH, et al. Search  
836 engine processor: Filtering and organizing peptide spectrum matches. *Proteomics*. 2012  
837 Apr 1;12(7):944–9.
- 838 30. Zhang B, Chambers MC, Tabb DL. Proteomic Parsimony through Bipartite Graph  
839 Analysis Improves Accuracy and Transparency. *J Proteome Res*. 2007 Sep;6(9):3549–57.
- 840 31. Hulsen T, de Vlieg J, Alkema W. BioVenn – a web application for the comparison and  
841 visualization of biological lists using area-proportional Venn diagrams. *BMC Genomics*.  
842 2008 Oct 16;9(1):488.
- 843 32. UniProt Consortium T. UniProt: the universal protein knowledgebase. *Nucleic Acids Res*.  
844 2018 Mar 16;46(5):2699–2699.
- 845 33. Kapopoulou A, Lew JM, Cole ST. The MycoBrowser portal: A comprehensive and  
846 manually annotated resource for mycobacterial genomes. *Tuberculosis*. 2011  
847 Jan;91(1):8–13.
- 848 34. Almagro Armenteros JJ, Tsirigos KD, Sønderby CK, Petersen TN, Winther O, Brunak S, et  
849 al. SignalP 5.0 improves signal peptide predictions using deep neural networks. *Nat*  
850 *Biotechnol*. 2019 Feb 18;

- 851 35. McIlwain S, Mathews M, Bereman MS, Rubel EW, MacCoss MJ, Noble WS. Estimating  
852 relative abundances of proteins from shotgun proteomics data. *BMC Bioinformatics*.  
853 2012;13:308.
- 854 36. Sudha D, Kohansal-Nodehi M, Kovuri P, Manda SS, Neriyanuri S, Gopal L, et al.  
855 Proteomic profiling of human intraschisis cavity fluid. *Clin Proteomics*. 2017;14(1):1–12.
- 856 37. Albrethsen J, Agner J, Piersma SR, Højrup P, Pham T V., Weldingh K, et al. Proteomic  
857 Profiling of *Mycobacterium tuberculosis* Identifies Nutrient-starvation-responsive  
858 Toxin–antitoxin Systems. *Mol Cell Proteomics*. 2013 May;12(5):1180–91.
- 859 38. Oliveros JC. Venny. An interactive tool for comparing lists with Venn’s diagrams.
- 860 39. Huang DW, Sherman BT, Lempicki RA. Bioinformatics enrichment tools: paths toward  
861 the comprehensive functional analysis of large gene lists. *Nucleic Acids Res*. 2009  
862 Jan;37(1):1–13.
- 863 40. Huang DW, Sherman BT, Lempicki RA. Systematic and integrative analysis of large gene  
864 lists using DAVID bioinformatics resources. *Nat Protoc*. 2009 Jan 1;4(1):44–57.
- 865 41. Perkins DN, Pappin DJC, Creasy DM, Cottrell JS. Probability-based protein identification  
866 by searching sequence databases using mass spectrometry data. *Electrophoresis*. 1999  
867 Dec 1;20(18):3551–67.
- 868 42. Proteome 2D-PAGE Database - Home [Internet]. [cited 2019 Jan 23]. Available from:  
869 <http://web.mpiib-berlin.mpg.de/cgi-bin/pdbs/2d-page/extern/index.cgi>
- 870 43. Mattow J, Jungblut PR, Müller E-C, Kaufmann SHE. Identification of acidic, low  
871 molecular mass proteins of *Mycobacterium tuberculosis* strain H37Rv by matrix-  
872 assisted laser desorption/ionization and electrospray ionization mass spectrometry.  
873 *Proteomics*. 2001 Apr;1(4):494–507.
- 874 44. Lew JM, Kapopoulou A, Jones LM, Cole ST. TubercuList - 10 years after. *Tuberculosis*  
875 (Edinb). 2011;91(1):1–7.
- 876 45. Wang M, You J, Bemis KG, Tegeler TJ, Brown DPG. Label-free mass spectrometry-based

- 877 protein quantification technologies in proteomic analysis. *Briefings Funct Genomics*  
878 *Proteomics*. 2008 Jun 25;7(5):329–39.
- 879 46. Zybailov B, Mosley AL, Sardu ME, Coleman MK, Florens L, Washburn MP. Statistical  
880 Analysis of Membrane Proteome Expression Changes in *Saccharomyces cerevisiae*. *J*  
881 *Proteome Res*. 2006 Sep;5(9):2339–47.
- 882 47. Stanley SA, Raghavan S, Hwang WW, Cox JS. Acute infection and macrophage  
883 subversion by *Mycobacterium tuberculosis* require a specialized secretion system. *Proc*  
884 *Natl Acad Sci*. 2003 Oct 28;100(22):13001–6.
- 885 48. Abdallah AM, Vandenbroucke-Grauls CMJE, Luirink J, Gey van Pittius NC, Cox J,  
886 Appelmelk BJ, et al. Type VII secretion — mycobacteria show the way. *Nat Rev*  
887 *Microbiol*. 2007;5(11):883–91.
- 888 49. Korotkova N, Freire D, Phan TH, Ummels R, Creekmore CC, Evans TJ, et al. Structure of  
889 the *Mycobacterium tuberculosis* type VII secretion system chaperone EspG 5 in  
890 complex with PE25-PPE41 dimer. *Mol Microbiol*. 2014;94(2):367–82.
- 891 50. Schubert OT, Ludwig C, Kogadeeva M, Zimmermann M, Rosenberger G, Gengenbacher  
892 M, et al. Absolute proteome composition and dynamics during dormancy and  
893 resuscitation of *Mycobacterium tuberculosis*. *Cell Host Microbe*. 2015;18(1):96–108.
- 894 51. Maki M, Renkonen R. Biosynthesis of 6-deoxyhexose glycans in bacteria. *Glycobiology*.  
895 2003 Dec 23;14(3):1R–15.
- 896 52. Alderwick LJ, Harrison J, Lloyd GS, Birch HL. The Mycobacterial Cell Wall--Peptidoglycan  
897 and Arabinogalactan. *Cold Spring Harb Perspect Med*. 2015 Mar 27;5(8):a021113.
- 898 53. Lu Q, Yao Q, Xu Y, Li L, Li S, Liu Y, et al. An Iron-Containing Dodecameric  
899 Heptosyltransferase Family Modifies Bacterial Autotransporters in Pathogenesis. *Cell*  
900 *Host Microbe*. 2014 Sep 10;16(3):351–63.
- 901 54. Alonso H, Parra J, Malaga W, Payros D, Liu C-F, Berrone C, et al. Protein O-  
902 mannosylation deficiency increases LprG-associated lipoarabinomannan release by

- 903           Mycobacterium tuberculosis and enhances the TLR2-associated inflammatory response.  
904           Sci Rep. 2017 Dec 11;7(1):7913.
- 905    55.    Dobos KM, Khoo KH, Swiderek KM, Brennan PJ, Belisle JT. Definition of the full extent of  
906           glycosylation of the 45-kilodalton glycoprotein of Mycobacterium tuberculosis. J  
907           Bacteriol. 1996 May;178(9):2498–506.
- 908    56.    Ragas A, Roussel L, Puzo G, Rivière M. The Mycobacterium tuberculosis Cell-surface  
909           Glycoprotein Apa as a Potential Adhesin to Colonize Target Cells via the Innate Immune  
910           System Pulmonary C-type Lectin Surfactant Protein A. J Biol Chem. 2007 Feb  
911           23;282(8):5133–42.
- 912    57.    Diaz-Silvestre H, Espinosa-Cueto P, Sanchez-Gonzalez A, Esparza-Ceron MA, Pereira-  
913           Suarez AL, Bernal-Fernandez G, et al. The 19-kDa antigen of Mycobacterium  
914           tuberculosis is a major adhesin that binds the mannose receptor of THP-1 monocytic  
915           cells and promotes phagocytosis of mycobacteria. Microb Pathog. 2005 Sep;39(3):97–  
916           107.
- 917    58.    Fischer J de S d. G, dos Santos MDM, Marchini FK, Barbosa VC, Carvalho PC, Zanchin  
918           NIT. A scoring model for phosphopeptide site localization and its impact on the  
919           question of whether to use MSA. J Proteomics. 2014;129:42–50.
- 920    59.    Lindestam Arlehamn CS, Sidney J, Henderson R, Greenbaum JA, James EA, Moutaftsi M,  
921           et al. Dissecting Mechanisms of Immunodominance to the Common Tuberculosis  
922           Antigens ESAT-6, CFP10, Rv2031c (hspX), Rv2654c (TB7.7), and Rv1038c (EsxJ). J  
923           Immunol. 2012 May 15;188(10):5020–31.
- 924    60.    Khoshnood S, Heidary M, Haeili M, Drancourt M, Darban-Sarokhalil D, Nasiri MJ, et al.  
925           Novel vaccine candidates against Mycobacterium tuberculosis. Int J Biol Macromol.  
926           2018 Dec;120:180–8.
- 927    61.    Ruhwald M, de Thurah L, Kuchaka D, Zaher MR, Salman AM, Abdel-Ghaffar A-R, et al.  
928           Introducing the ESAT-6 free IGRA, a companion diagnostic for TB vaccines based on

- 929 ESAT-6. *Sci Rep.* 2017 May 7;7(1):45969.
- 930 62. Okkels LM, Müller EC, Schmid M, Rosenkrands I, Kaufmann SHE, Andersen P, et al.  
931 CFP10 discriminates between nonacetylated and acetylated ESAT-6 of *Mycobacterium*  
932 tuberculosis by differential interaction. *Proteomics.* 2004;4(10):2954–60.
- 933 63. Sonawane A, Mohanty S, Jagannathan L, Bekolay A, Banerjee S. Role of glycans and  
934 glycoproteins in disease development by *Mycobacterium tuberculosis*. *Crit Rev*  
935 *Microbiol.* 2012;38(3):250–66.
- 936 64. Forrellad MA, Klepp LI, Gioffré A, Sabio García J, Morbidoni HR, de la Paz Santangelo M,  
937 et al. Virulence factors of the *Mycobacterium tuberculosis* complex. *Virulence.*  
938 2013;4(1):3–66.
- 939 65. Hatherill M, Tait D, McShane H. Clinical Testing of Tuberculosis Vaccine Candidates. In:  
940 Tuberculosis and the Tubercle Bacillus, Second Edition. American Society of  
941 Microbiology; 2016. p. 193–211.
- 942 66. Nielsen H. Predicting secretory proteins with signalP. In: *Methods in Molecular Biology.*  
943 2017. p. 59–73.
- 944 67. Kovacs-Simon A, Titball RW, Michell SL. Lipoproteins of Bacterial Pathogens. *Infect*  
945 *Immun.* 2011 Feb;79(2):548.
- 946 68. York IA, Stevens J, Alymova I V. Influenza virus N-linked glycosylation and innate  
947 immunity. *Biosci Rep.* 2019 Jan 31;39(1):BSR20171505.
- 948 69. Børud B, Bårnes GK, Brynildsrud OB, Fritzsønn E, Caugant DA. Genotypic and  
949 Phenotypic Characterization of the O-Linked Protein Glycosylation System Reveals High  
950 Glycan Diversity in Paired Meningococcal Carriage Isolates. *J Bacteriol.* 2018 Aug  
951 15;200(16):e00794-17.

952

953



## 954 **Supporting information**

955 **S1 Fig. Analysis of *M. tuberculosis* CFP by liquid chromatography tandem mass spectrometry**  
956 **(LC-MS/MS).**

957 **2A:** *M. tuberculosis* CFP analysis by 1D SDS-PAGE 15% and CCB G-250 staining. Two technical  
958 replicates (CFP(1) and CFP(2), 25 ug each) were loaded. Six gel slices were excised from each  
959 lane according to protein density. Numbers indicate gel slices analyzed by LC-MS/MS. MWM:  
960 Molecular weight marker (Thermo Fischer Scientific, # 26616). **2B:** Spectrum counts of proteins  
961 identified in each technical replicate. Replicates show no statistical differences ( $p > 0.05$ ). **2C:**  
962 Analysis of proteins identified in each replicate by area-proportional Venn Diagram comparison  
963 [31]

964 **S2 Fig. Proteins showing glycosylated and unglycosylated equivalent peptides.**

965 Some protein examples are shown: 1) Apa (modification: Hex), 2) LprF (modification: Hex), LppO  
966 (modification: Hex-Hex), Apa (modification: Hex-Hex-Hex), EsxA (modification: Pentose).

967 **S3 Fig. Scans of glycosylated peptides statistically confirmed in Mascot Server MS/MS Ions**  
968 **Search against NCBIprot (AA).**

969 Some examples are shown: 1) LppO (modification: Hex), 2) EsxA (modification: DeoxyHex), 3)  
970 EsxA (modification: Pentose).

971 **S1 Table. Proteins identified with nano-HPLC MS/MS.**

972 Sheet 1) Common proteins list including Uniprot identification, protein description, protein  
973 length and molecular weight, gene name and *M. tuberculosis H37Rv* gene annotation (Rv) of  
974 Sanger Institut ([http://sanger.ac.uk/projects/M\\_tuberculosis/Gene\\_list/](http://sanger.ac.uk/projects/M_tuberculosis/Gene_list/)). Sheet 2) Proteins  
975 identified in replica CFP(1), Sheet 3) Proteins identified in replica CFP(2), both lists including  
976 Uniprot identification as obtained in Patternlab for Proteomics, sequence count, spectrum  
977 count, number of unique peptides, protein coverage and protein description.

978 **S2 Table. Proteins with predicted signal peptides**

979 Sheet 1) Signal peptide prediction (SignalP 5.0) in *M. tuberculosis* H37Rv reference proteome  
980 (UP000001584), Sheet 2) Signal peptide prediction (SignalP 5.0) in *M. tuberculosis* H37Rv CFP,  
981 Sheet 3) Proteins in *M. tuberculosis* H37Rv CFP with signal peptides predicted with SignalP 5.0.

982 **S3 Table. Protein abundance comparison against de Souza *et al*, 2011**

983 Comparison of our proteomic data against the proteomic quantitative approach performed by  
984 de Souza *et al*, 2011 [13].

985 **S4 Table. Proteins without proteomic annotation in Mycobrowser**

986 Proteins identified in *M. tuberculosis* H37Rv CFP without proteomic annotation in Mycobrowser  
987 (Release 3 (2018-06-05)) [33].

988 **S5 Table. Peptides of proteins not previously detected at proteomic level**

989 Sheet 1) Proteins in *M. tuberculosis* H37Rv CFP without previous evidence of expression at  
990 protein level, Sheet 2) Scans of peptides confirming proteins identified in *M. tuberculosis* H37Rv  
991 CFP without previous evidence at protein level.

992 **S6 Table. Scans of O-glycosylated peptides in *M. tuberculosis* H37Rv culture filtrate proteins**

993 The table includes the File name where the scan was identified, the scan number, peptide charge  
994 (Z), measured and theoretical mass and the difference (in ppm), scores (primary, secondary, etc),  
995 peptide sequence, modification (glycan), glycosylation site p-value, protein and gene data.

996 **S7 Table. O-glycosylation analysis of raw files of Alberthsen *et al*, 2013.**

997 Scans confirming O-glycosylated peptides identified by us in the analysis of the raw data files  
998 deposited by Alberthsen *et al*. [37].

**A. Relationship between *M. tuberculosis* CFP proteins identified in different studies**

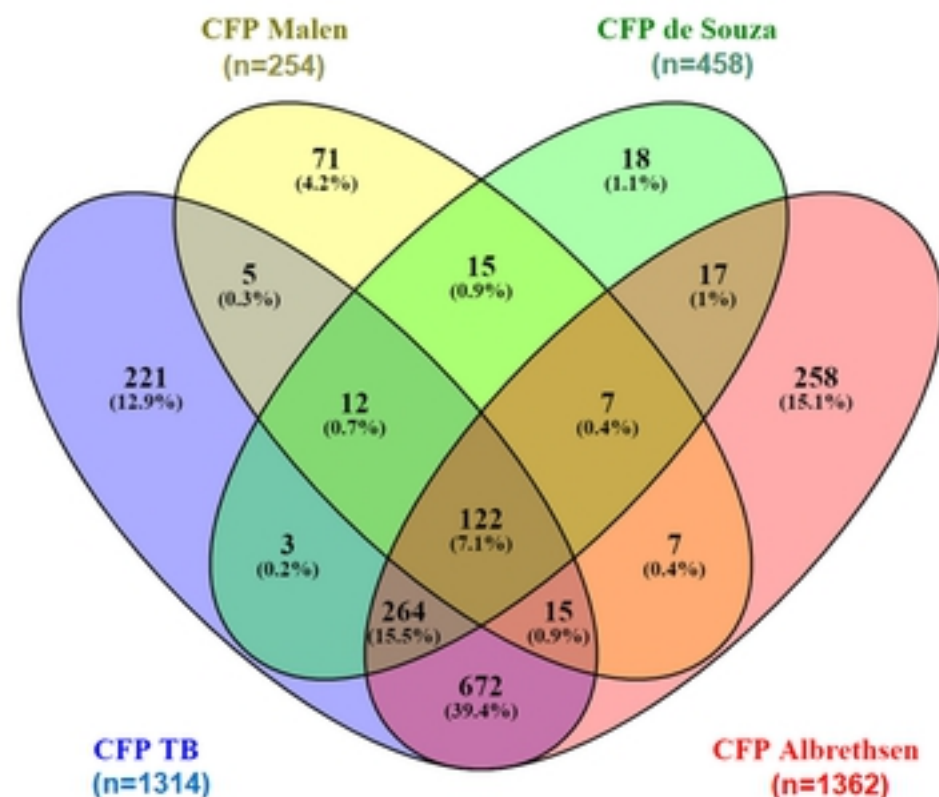

**B. Abundance of identified proteins according to number of studies**

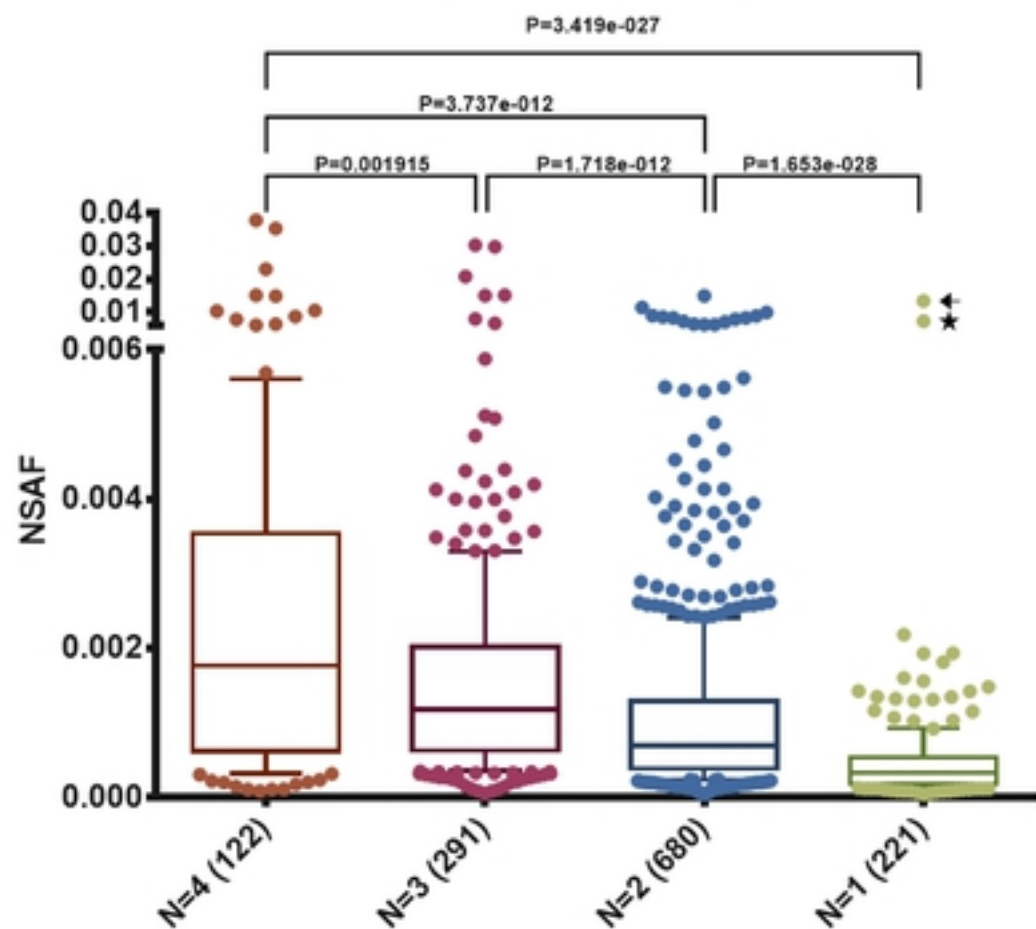

N=4 Proteins identified in this study and in Malen, de Souza and Albrethsen  
 N=3 Proteins identified in this study and in two other studies comprising Malen, de Souza and Albrethsen  
 N=2 Proteins identified in this study and in one other study (Malen, de Souza or Albrethsen)  
 N=1 Proteins identified only in this study

Fig 3

**A. Number of scans of glycosylated proteins**

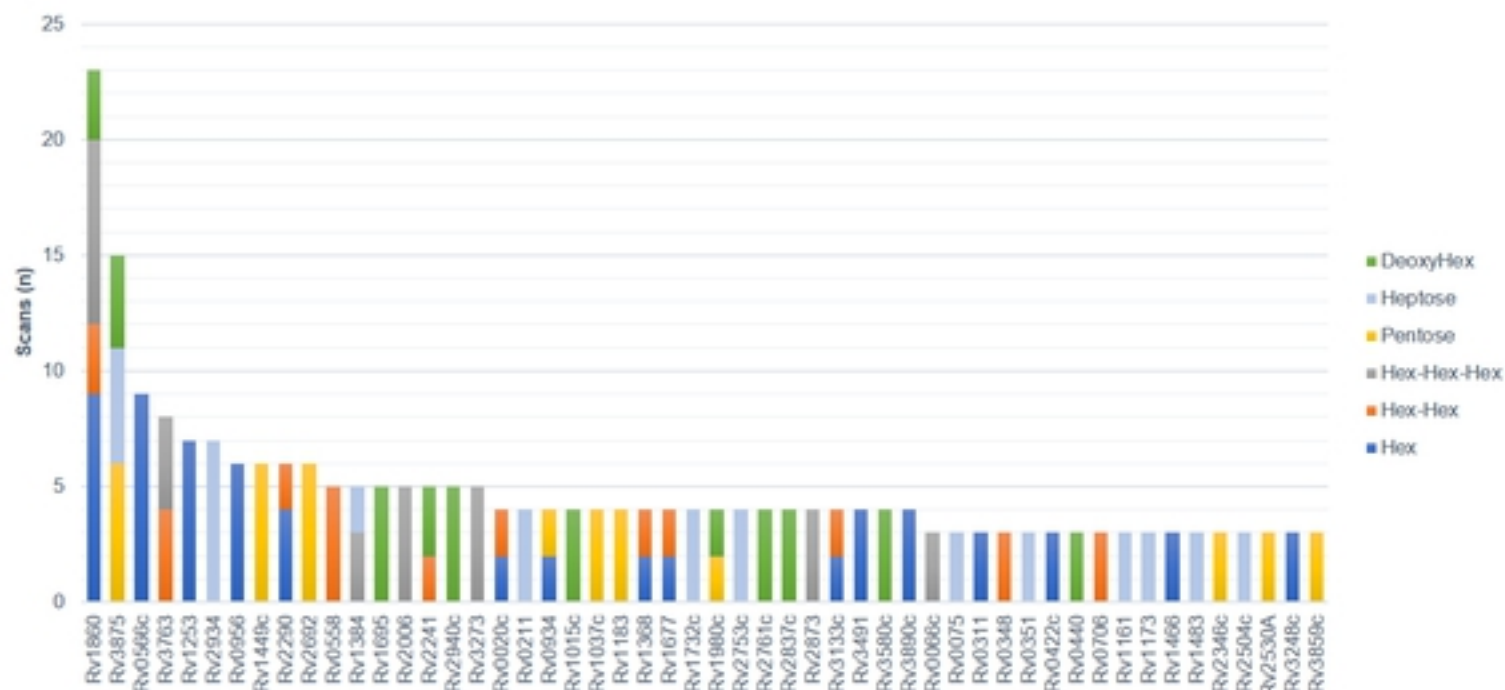

**B. Gene Ontology analysis of MTB glycoproteins**

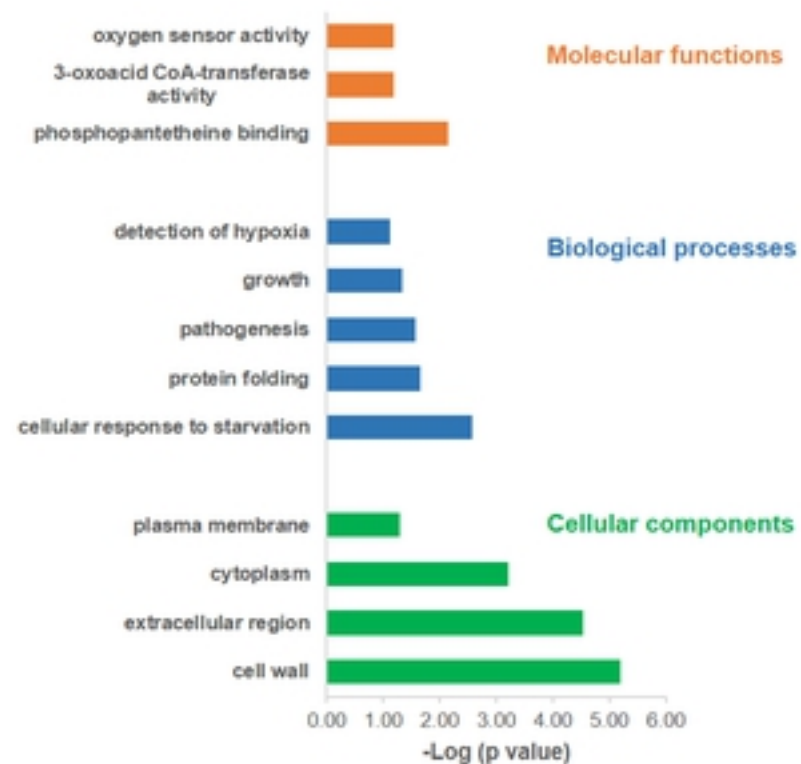

**Fig 4**

### A. EsxA Heptose peptide spectrum

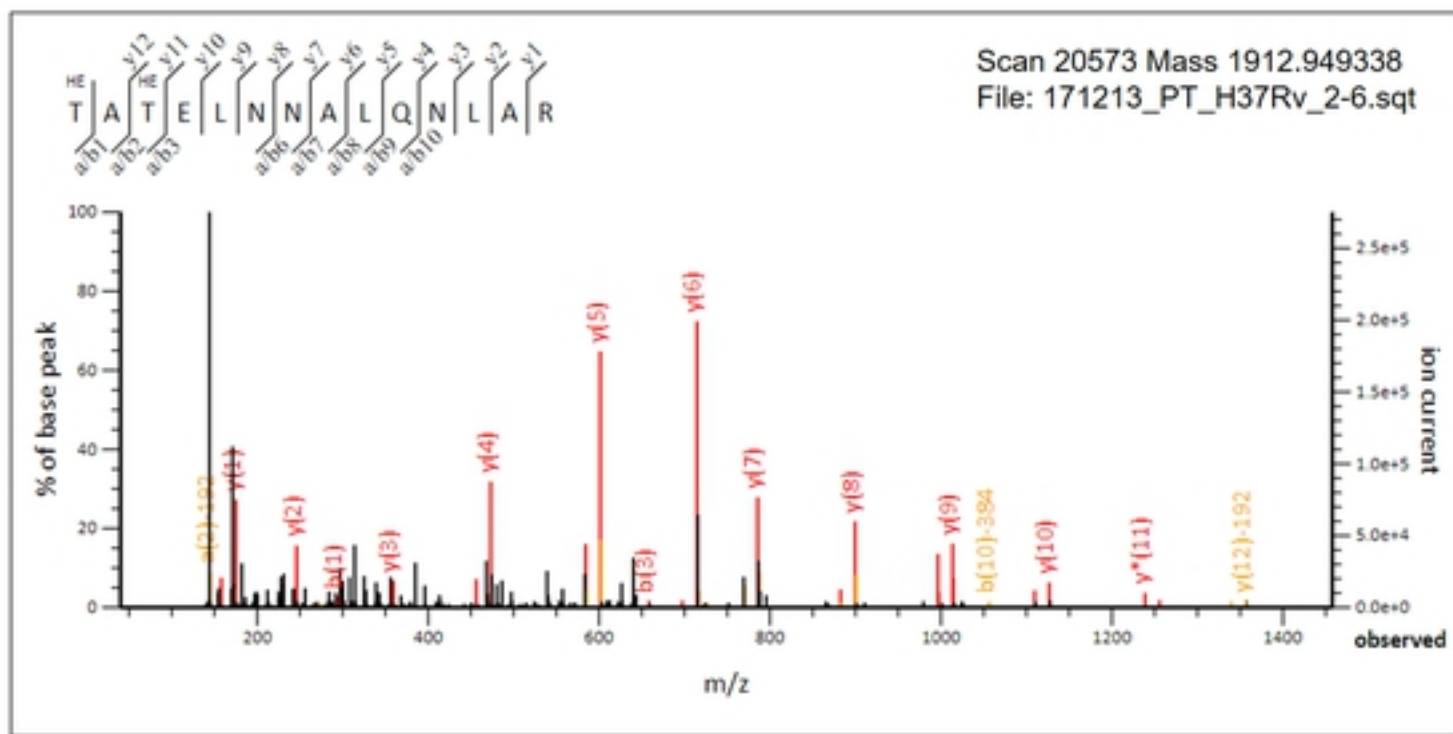

### B. EsxA Heptose matched fragment ions

Monoisotopic mass of neutral peptide Mr(calc): 1911.9272

Fixed modifications: Carbamidomethyl (C) (apply to specified residues or term)

Variable modifications:

T1 : Hep (ST), with neutral losses 192.0634(shown in table), 0.0000

T3 : Hep (ST), with neutral losses 192.0634(shown in table), 0.0000

Ions Score: 85 Expect: 0.013 ([help](#))

| #  | a         | a*        | b         | b*        | Seq. | y         | y*        | #  |
|----|-----------|-----------|-----------|-----------|------|-----------|-----------|----|
| 1  | 74.0600   |           | 102.0550  |           | T    |           |           | 14 |
| 2  | 145.0972  |           | 173.0921  |           | A    | 1427.7601 | 1410.7336 | 13 |
| 3  | 246.1448  |           | 274.1397  |           | T    | 1356.7230 | 1339.6965 | 12 |
| 4  | 375.1874  |           | 403.1823  |           | E    | 1255.6753 | 1238.6488 | 11 |
| 5  | 488.2715  |           | 516.2664  |           | L    | 1126.6327 | 1109.6062 | 10 |
| 6  | 602.3144  | 585.2879  | 630.3093  | 613.2828  | N    | 1013.5487 | 996.5221  | 9  |
| 7  | 716.3573  | 699.3308  | 744.3523  | 727.3257  | N    | 899.5057  | 882.4792  | 8  |
| 8  | 787.3945  | 770.3679  | 815.3894  | 798.3628  | A    | 785.4628  | 768.4363  | 7  |
| 9  | 900.4785  | 883.4520  | 928.4734  | 911.4469  | L    | 714.4257  | 697.3991  | 6  |
| 10 | 1028.5371 | 1011.5106 | 1056.5320 | 1039.5055 | Q    | 601.3416  | 584.3151  | 5  |
| 11 | 1142.5800 | 1125.5535 | 1170.5749 | 1153.5484 | N    | 473.2831  | 456.2565  | 4  |
| 12 | 1255.6641 | 1238.6375 | 1283.6590 | 1266.6325 | L    | 359.2401  | 342.2136  | 3  |
| 13 | 1326.7012 | 1309.6747 | 1354.6961 | 1337.6696 | A    | 246.1561  | 229.1295  | 2  |
| 14 |           |           |           |           | R    | 175.1190  | 158.0924  | 1  |

Fig 5

**A. 1D SDS-PAGE**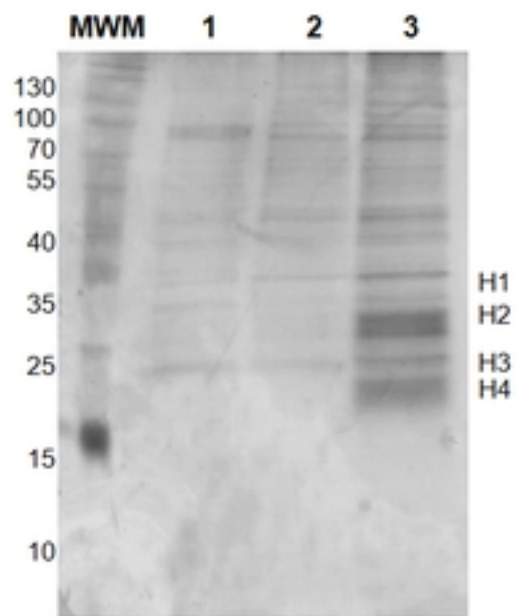**B. 2D SDS-PAGE**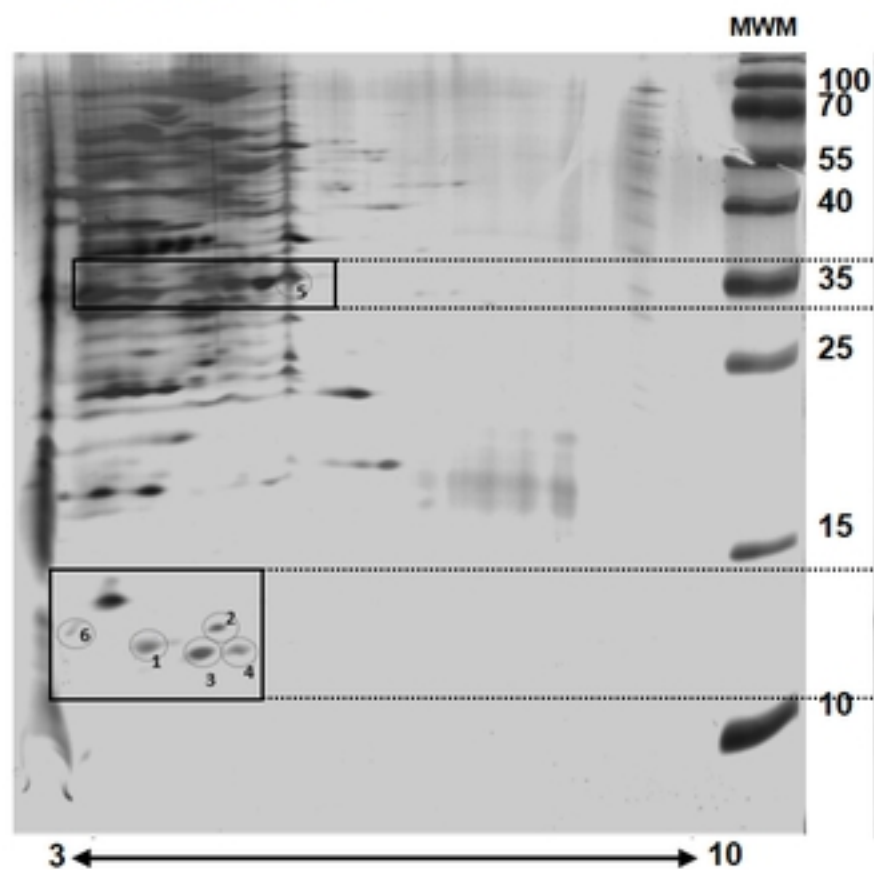**C. 2D western blot**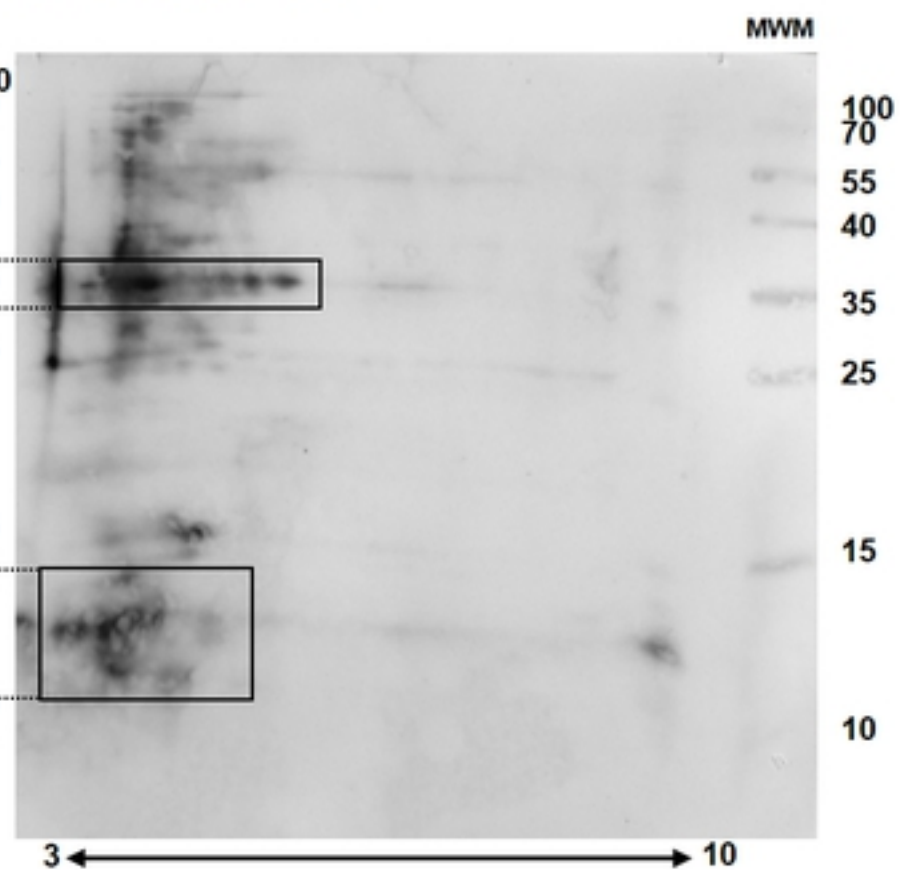**Fig 1**

**A. Gene Ontology analysis of *M. tuberculosis* CFP**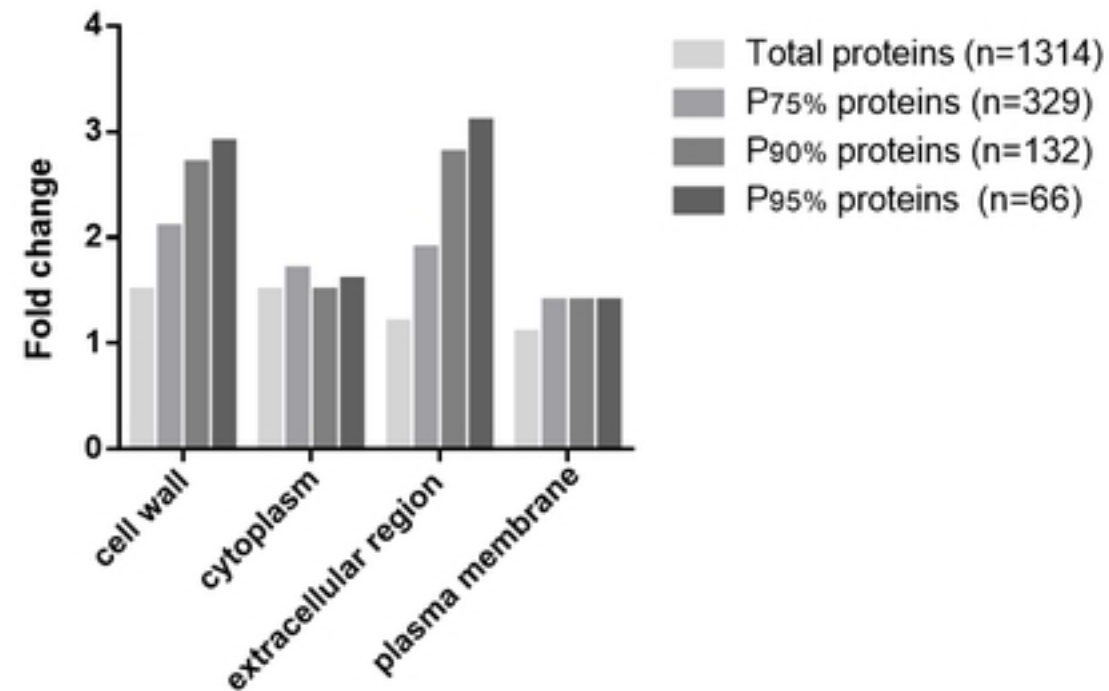**B. Functional categories of *M. tuberculosis* CFP**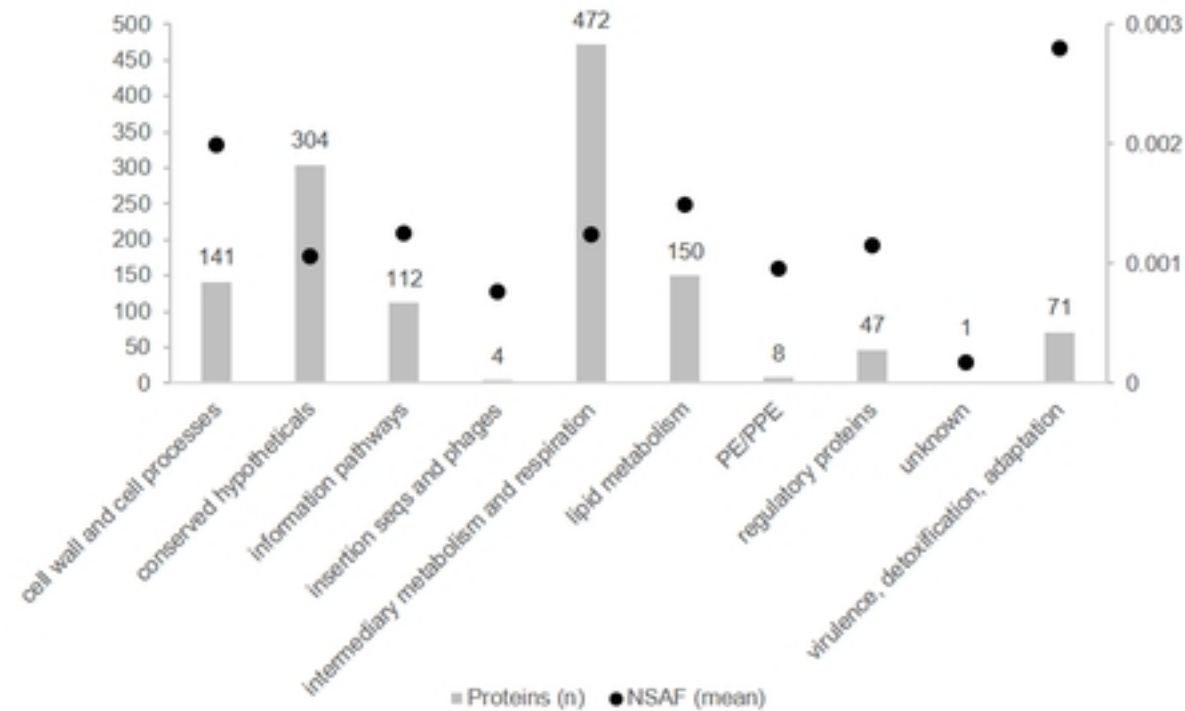**Fig 2**
